1 **Naming Human Diseases: Ethical Principles of Curating Exclusive**  
2 **Substitute for Inopportune Nosology**

3 **Authors' names:**

4 Zhiwen Hu<sup>1\*</sup>, PhD; Ya Chen<sup>1</sup>, MA; Yuling Song<sup>2</sup>, MA; Zhongliang Yang<sup>3\*</sup>, PhD; Hui  
5 Huang<sup>2</sup>, PhD

6 **The affiliation and address of the authors:**

7 <sup>1</sup>School of Computer and Information Engineering, Zhejiang Gongshang University,  
8 Hangzhou, China

9 <sup>2</sup>College of Computer Science and Artificial Intelligence, Wenzhou University,  
10 Wenzhou, China

11 <sup>3</sup>Beijing National Research Center for Information Science and Technology (BNRist),  
12 Tsinghua University, Beijing, China

13

14 \*These authors contributed equally.

15

16 **Correspondence:**

17 Zhiwen Hu

18 School of Computer and Information Engineering, Zhejiang Gongshang University

19 No 18 Xuezheng Street, Higher Education Zone, Hangzhou 310018, China

20 Phone: 86 0571 28008316

21 Email: [huzhiwen@zjgsu.edu.cn](mailto:huzhiwen@zjgsu.edu.cn)

22 **Authors' contributions:**

23 ZWH and ZLY were involved in the conceptual design of the study. YC, YLS, ZLY and  
24 HH performed the metadata analyses. The authors wrote and approved the final  
25 manuscript.

26 **Ethics approval and consent to participate:**

27 Not applicable.

28 **Competing interests:**

29 The authors declare no potential conflicts of interest.

30 **Data availability:**

31 The synthetic data generated in this study and custom code supporting this study are  
32 available at GitHub ([https://github.com/YaChen8/Naming\\_human\\_disease](https://github.com/YaChen8/Naming_human_disease)).

33 **Acknowledgements:**

34 We hereby desire to express indebtedness to anonymous reviewers for their valuable and  
35 constructive comments. This study was partially supported by the National Natural  
36 Science Foundation of China under Grant U1936208, the Zhejiang Provincial Natural  
37 Science Foundation of China under Grant LZ21F020004, and the Open Research Project  
38 of the State Key Laboratory of Media Convergence and Communication, Communication  
39 University of China under Grant SKLMCC2021KF015.

40

## 41 **Naming Human Diseases: Ethical Principles of Curating Exclusive** 42 **Substitute for Inopportune Nosology**

43

### 44 *Abstract*

45 **Background:** In the medical sphere, understanding naming conventions strengthen the  
46 integrity of naming human diseases remains nominal rather than substantial yet. Since the  
47 current nosology-based standard for human diseases could not offer a one-size-fits-all  
48 corrective mechanism, many idiomatic but flawed names frequently appear in scientific  
49 literature and news outlets at the cost of sociocultural impacts.

50 **Objective:** We attempt to examine the ethical oversights of current naming practices and  
51 propose heuristic rationales and approaches to determine a pithy name instead of an  
52 inopportune nosology.

53 **Methods:** First, we examined the compiled global online news volumes and emotional  
54 tones on some inopportune nosology like *German measles*, *Middle Eastern Respiratory*  
55 *Syndrome*, *Spanish flu*, *Hong Kong flu*, and *Huntington's disease* in the wake of COVID-  
56 19. Second, we prototypically scrutinize the lexical dynamics and pathological  
57 differentials of *German measles* and common synonyms by leveraging the capacity of  
58 the Google Books Ngram Corpus. Third, we demonstrated the empirical approaches to  
59 curate an exclusive substitute for an anachronistic nosology *German measles* based on  
60 deep learning models and *post-hoc* explanations.

61 **Results:** The infodemiological study shows that the public informed the offensive names  
62 with extremely negative tones in textual and visual narratives. The findings of the  
63 historiographical study indicate that many synonyms of *German measles* did not survive,  
64 while *German measles* became an anachronistic usage, and *rubella* has taken the  
65 dominant place since 1994. The PubMedBERT model could identify *rubella* as a  
66 potential substitution for *German measles* with the highest semantic similarity. The  
67 results of the semantic drift experiments further indicate that *rubella* tends to survive  
68 during the ebb and flow of semantic drift.

69 **Conclusions:** Our findings indicate that the nosological evolution of anachronistic names  
70 could result in sociocultural impacts without a corrective mechanism. To mitigate such  
71 impacts, we introduce some ethical principles for formulating an improved naming  
72 scheme. Based on deep learning models and *post-hoc* explanations, our illustrated  
73 experiments could provide hallmark references to the remedial mechanism of naming  
74 practices and pertinent credit allocations.

75

76 **Keywords:** human diseases; anachronistic usage; narrative ethics; credit allocation; deep  
77 learning

### 78 *Introduction*

#### 79 **Background**

80 Terminology is the crystallization of human scientific and technological knowledge in  
81 natural language. In the medical sphere, appropriate names were deliberately invented for  
82 the designation of human diseases with pathological characteristics. However,  
83 underrepresented emphasis has been placed on the nomenclature of human diseases. The  
84 current wave of destigmatization calls for constant introspection of the offensive  
85 appellations of human diseases [1–3]. In the same week, the anachronistic usage of  
86 *German measles* in the leading journals *Nature* and *Science* without any caution implies

87 that some strongly-held but flawed names may brand social stigma and discrimination  
88 [4–6].

89 In the 19<sup>th</sup> century, the name *rubella* was proposed as a substitute for German term  
90 *rötheln*, then the epidemic neologism *German measles* was gradually accepted as  
91 idiomatic usages [7–16]. However, anachronistic usages like that violate the latest naming  
92 protocols of the World Health Organization (WHO) – stigmatizing a specific country and  
93 its residents [1]. Arguably, the looming worry is to reignite the torch of discrimination  
94 and fuel the current infodemic unconsciously [3,17–20].

95

## 96 **Study Objectives**

97 Based on extensive literature review, this study aims to punctuate heuristic introspection  
98 of naming practices for human diseases and address the following research issues:

99 [1] Did the anachronistic names like *German measles* cost social impacts?

100 [2] What are the diachronic discourses of *German measles* and common synonyms?  
101 What can we learn from the lexical evolution?

102 [3] Should we hash out inopportune names like *German Measles*? And How?

103 [4] What are the pertinent principles of curating the exclusive substitute for an  
104 anachronistic nosology?

## 105 **Methods**

106 Rich collections of the printed or digital imprint of social individuals are formidable  
107 proxies to determine the dynamic pragmatics patterns of practical utterances and reveal  
108 the collective human behaviours from sociocultural preferences [21,22]. Following the  
109 Preferred Reporting Items for Systematic Reviews and Meta-Analyses (PRISMA)  
110 guidelines [23], here we orchestrate rich metadata available to unveil the scientific  
111 paradigms via the following experiments (**Multimedia Appendix 1**).

112 **Infodemiological study.** In the global online news coverage experiments, we aim to  
113 unveil the scientific paradigms of the diachronic discourse and emotional tone. Here, the  
114 metadata analysis aims to demonstrate the emotional polarity of the public in the context  
115 of global online news on *German measles*, *Middle Eastern Respiratory Syndrome*,  
116 *Spanish flu*, *Hong Kong flu*, and *Huntington's disease* over time, respectively.

117 First, the code scheme was curated following three main principles that we established  
118 before [24]. According to the code scheme, the search formulas are available in  
119 **Multimedia Appendix 2**. Second, the unbiased and comprehensive metadata of global  
120 online news coverage and emotional tone retrieved through the open project GDELT  
121 Summary between December 30, 2019 (the outbreak of COVID-19) and May 8, 2021  
122 (the Sixth anniversary of *World Health Organization Best Practices for the Naming of*  
123 *New Human Infectious Diseases*), including the textual and visual narratives of different  
124 queries [25,26]. Finally, by leveraging the capacity of GDELT's machine translate and  
125 neural network image recognition [26], the instant news portfolio in **Figure 1** summarizes  
126 the textual and visual narratives of different queries in 65 multilingual online news. The  
127 volume ratio is the total volume of matching articles divided by the total number of all  
128 articles monitored by GDELT. The emotional tone is the average tone of all matching  
129 documents, and the normalized score ranges from -10 (extremely negative) to +10  
130 (extremely positive) based on the tonal algorithm.

131 **Historiographical study.** The Google Books Ngram Corpus (GBNC) is a unique  
132 linguistic landscape that benefits from centuries of development of rich grammatical and  
133 lexical resources as well as its cultural context [27]. It contains *n*-grams from  
134 approximately 8 million books, or 6% of all books published in English, Hebrew, French,  
135 German, Spanish, Russian, Italian, and Chinese. The GBNC covers data logs from 1500

136 to 2019. A unigram (1-gram) is a string of characters uninterrupted by a space, and an  $n$ -  
137 gram ( $n$  consecutive words) is a sequence of a 1-gram, such as *morbilli* (unigram),  
138 *rubeola* (unigram), *rubella* (unigram), *Rötheln* (unigram), and *German measles* (bigram).  
139 In this study, by retrieving the use frequency of a specific lexicon in historical  
140 development, we first obtain a glimpse of the nature of historical evolution in **Figure 3**.

141 Then, as we continue to stockpile seminal patterns in **Figure 3**, some have argued that  
142 correlation is threatening to unseat causation as the bedrock of scientific storytelling  
143 before. We must punctuate heuristic cautions of wrestling with information from  
144 retrospective sources, cross-validation, and the reassembly of the whole story. Finally,  
145 we provide compelling arguments to the extent of understanding the underneath nature  
146 of lexical dynamics and pathological differentials based on authentic materials and  
147 critical examination.

148 **Semantic similarity experiments.** Based on the epistemic results of the above  
149 historiographical study, as an exemplificative case, we could construct the initial  
150 candidates of *German measles*, which includes *morbilli*, *rubeola*, *rubella*, and *rötheln*.  
151 Relatedly, as prior knowledge, the term *rotheln* is ordinarily used as a translation of the  
152 German term *rötheln* in literature. From the outset, it's reasonable to expand the initial  
153 candidates to *morbilli*, *rubeola*, *rubella*, *rötheln*, and *rotheln*.

154 Directed at five expanded candidate words, we employed the BERT model and  
155 PubMedBERT model to quantify the semantic similarities between them, respectively.  
156 The cosine similarity formulas to calculate semantic relevance is as follows:

$$157 \quad \text{similarity} = \frac{A \cdot B}{\|A\| \|B\|} = \frac{\sum_{i=1}^n A_i B_i}{\sqrt{\sum_{i=1}^n (A_i)^2} \times \sqrt{\sum_{i=1}^n (B_i)^2}}, \quad (1)$$

158 where  $A$  and  $B$  denote two vectors,  $A_i$  and  $B_i$  ( $i = 1 \dots n$ ) represent the components of  
159 vector  $A$  and  $B$ .

160 The BERT model and PubMedBERT model have the same architecture with different  
161 corpora for preliminary training and pre-training (**Figure 4**). Coupling with a multi-layer  
162 bidirectional transformer encoder and bidirectional self-attention, the BERT and  
163 PubMedBERT models are more sensitive to semantics than the constrained self-attention  
164 used by GPT-2 model. The former uses the BookCorpus (800M words) and English  
165 Wikipedia (2,500M words) for training, its multilingual pre-training model can handle  
166 over more than 100 languages [28]. The latter model uses the latest collection of PubMed  
167 abstracts (14M abstracts, 3.2B words, 21GB), and its pre-training model can facilitate  
168 understanding the word semantic in the medical field [29]. The two models used the  
169 Wordpiece embeddings with their own token vocabularies. The two models are capable  
170 to verify the homology between *rötheln*, and *rotheln*, and identify the target word with  
171 the closest similarity to *German measles* in the initial candidates (**Figure 5**). For *post-hoc*  
172 explanations, PubMedBERT-generated case studies available facilitate to demystify the  
173 typical scenarios in pre-training narratives.

174 **Semantic drift experiments.** We analyzed the dynamic evolution of the five keywords  
175 *German measles*, *morbilli*, *rubeola*, *rubella*, and *rötheln*. In the experiments, the two-  
176 stage text corpora were retrieved from GBNC. Specifically, we choose two time periods:  
177 one or two hundred years after the word appeared and 1950 to 2020. Each keyword has  
178 two corpora, and each corpus has 1,000 targeted snippets published in two time periods  
179 with random sampling.

180 To accurately demonstrate the semantic evolution of each keyword, we orchestrate  
181 their synchronic and diachronic semantic structures. Since a word's historical meaning  
182 can be inferred by its most semantically similar words in two time periods, we could track  
183 down how the semantics of words change over time [30,31]. Firstly, we used word co-  
184 occurrence matrix to build semantic representations in two time periods, in this way the

185 meaning of the word could be approximated in the contexts over time. By the word co-  
186 occurrence matrix, we curated some semantic neighbors for the keywords *German*  
187 *measles*, *morbilli*, *rubeola*, *rubella*, and *rötheln*, respectively. Secondly, based on the  
188 word co-occurrence matrix, positive pointwise mutual information (PPMI) matrix entries  
189 are given by:

$$190 \quad PPMI(x, y) = \max\left(0, \log_2 \frac{C(x,y) \cdot N}{C(x)C(y)}\right), \quad (2)$$

191 where  $C$  represents word co-occurrence matrix,  $C(x, y)$  refers to the number of co-  
192 occurrences of the words  $x$  and  $y$ ,  $C(x)$  represents the number of occurrences of the word  
193  $x$ ,  $C(y)$  represents the number of occurrences of the word  $y$ ,  $N$  represents the number of  
194 words in the corpus. Thirdly, we used singular value decomposition (SVD) to obtain a  
195 4500×4500 matrix for the corpus of the two time periods. Finally, in **Figure 6**, we  
196 employed principal component analysis (PCA) to reduce the dimensions of word  
197 embeddings from 4,500 to 2 and then projected the uncharted latent patterns in the five  
198 word-embeddings clusters.

## 199 **Results**

### 200 **Ethical oversights of naming practices**

201 May 8, 2021 marks 6 years since the first best practices of new human infectious diseases  
202 was announced by WHO [1]. In recent years, we have witnessed many outbreaks of  
203 human diseases, with proper names given by stakeholders. Sometimes, diseases are  
204 initially given interim names or common names. Then, the proper names are officially  
205 ratified by the International Classification of Diseases (ICD) of WHO. Even so, each  
206 round of naming practice is not always successful [1,32,33]. Of them, *Middle Eastern*  
207 *Respiratory Syndrome* (MERS) [34], *Spanish flu* [35,36], *Hong Kong flu* (1968-  
208 1969)[37–39], and *Huntington's disease* [40–43] have been accused of unnecessary social  
209 impacts in previous studies (**Figure 1**).

210 Naming conventions are not merely for naming diseases but for the vitality of science  
211 and the promotion of social progress [2,33,44,45]. Evidently, as shown in **Figure 1**, the  
212 results of the infodemiological study show that the global news outlets (in 65 languages)  
213 enjoy long-standing but flawed naming conventions with extremely negative tones, such  
214 as *German measles*, *Middle Eastern Respiratory Syndrome*, *Spanish flu*, *Hong Kong flu*,  
215 and *Huntington's disease*. Admittedly, the coverage of affective tones is much negative  
216 than the standard portrayal assumes on average [46]. This finding highlights that these  
217 controversial stereotypes confounded the generally accepted norms at the cost of social  
218 progress, such as worsening acute stress of patients, provoking the backlash against  
219 particular communities, triggering unjustified slaughtering of food animals, and creating  
220 needless travel barriers or trade barriers [1–3,47,48].

221 Understanding how naming conventions strengthen the integrity of naming practices  
222 remains nominal rather than substantial yet. In the COVID-19 infodemic, multifarious  
223 monikers have become explicit consideration in the COVID-19 paper tsunami, and the  
224 global profusion of tangled hashtags has found their ways in daily communication [49].  
225 Just as the remarks of the editorial of *Nature*, “As well as naming the illness, the WHO  
226 was implicitly sending a reminder to those who had erroneously been associating the virus  
227 with Wuhan and with China in their news coverage – including *Nature*. That we did so  
228 was an error on our part, for which we take responsibility and apologize.”[50]  
229 Unfortunately, many more stigmatized names somewhat aggravate the collective  
230 perceptual biases and contribute to recent backlash against Asians and diaspora [24,51].



231 Accordingly, scientists must verse themselves in naming conventions rather than feeding  
 232 the trolls of stigma and discrimination.

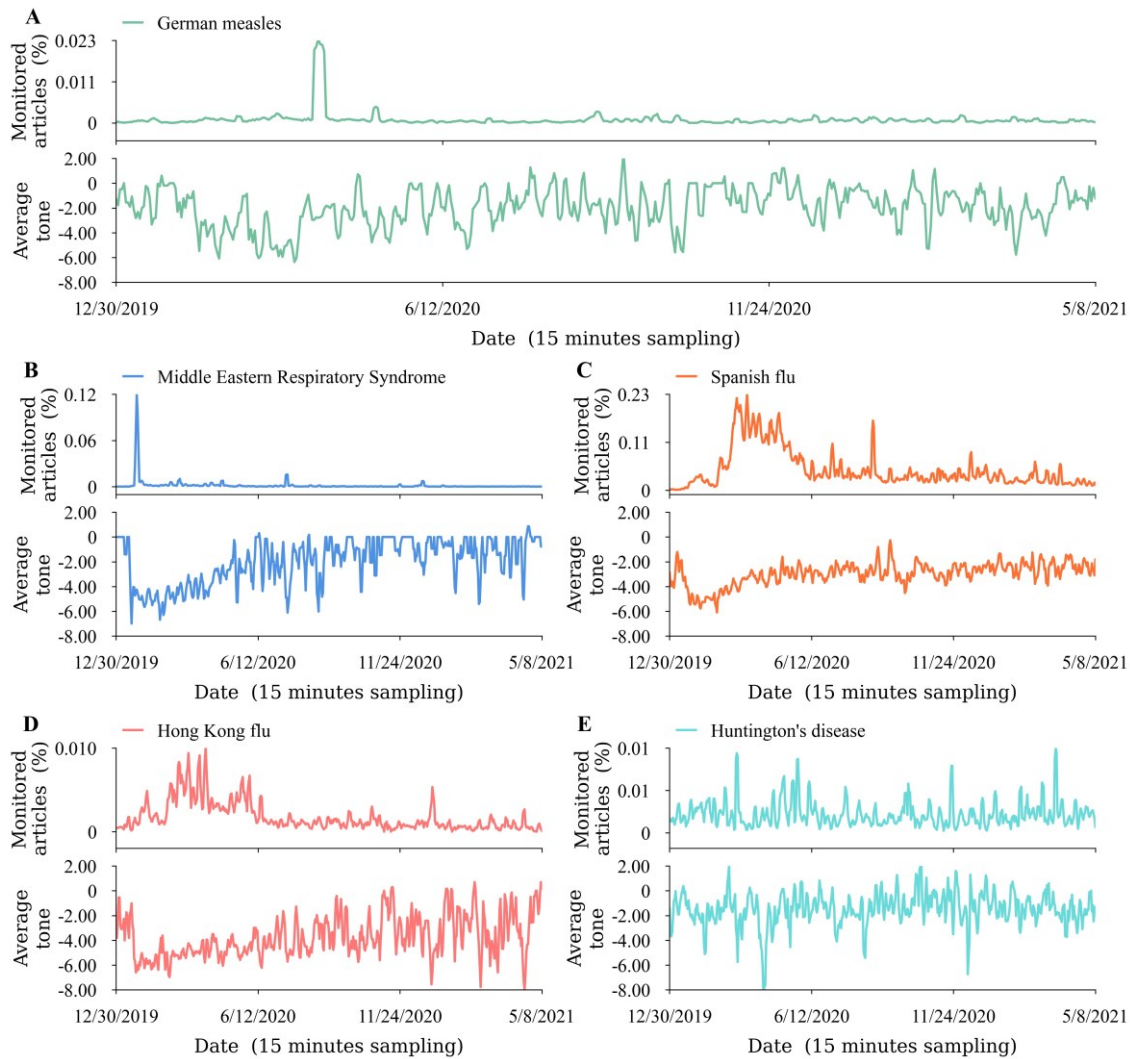

233  
 234 **Figure 1.** Prevailing stereotypes of stigmatizing names with negative tones in the wake  
 235 of COVID-19 pandemic. The global instant news portfolio on GDELT Summary  
 236 summarizes the textual and visual narratives of different queries in 65 multilingual online  
 237 news: A, *German measles*; B, *Middle Eastern Respiratory Syndrome*; C, *Spanish flu*; D,  
 238 *Hong Kong flu*; and E, *Huntington's disease*. The upper panels display the percent of all  
 239 global online news coverage over time. The lower panels show the average emotional  
 240 tone of all news coverage from extremely negative to extremely positive. The temporal  
 241 resolution of sampling is 15 minutes per day.

242 **Ethical principles of naming human diseases**

243 Of similar concern, we witness that many anachronistic names, from *Spanish flu* to *Zika*,  
 244 and from *Lyme* to *Ebola*, are named after geographic places in our daily communications.  
 245 But they are stigmatized cases and plain inaccurate (**Table 1**).

246 **Table 1.** Many diseases' names have complained of both stigmatization and inaccurate.

| Name               | Complains                                                                                                       | References |
|--------------------|-----------------------------------------------------------------------------------------------------------------|------------|
| <i>Spanish Flu</i> | The 1918-19 influenza outbreak now often referred to as the <i>Spanish flu</i> did not even originate in Spain. | [52,53]    |

|                           |                                                                                                                                                                                                                                                            |         |
|---------------------------|------------------------------------------------------------------------------------------------------------------------------------------------------------------------------------------------------------------------------------------------------------|---------|
| <i>Zika virus disease</i> | A mosquito-borne disease caused by <i>Zika virus</i> was first identified in Uganda in 1947 in monkeys, and later identified in humans in 1952. <i>Zika virus disease</i> was named after the Zika forest of Uganda.                                       | [54]    |
| <i>Lyme disease</i>       | <i>Lyme disease</i> was named after the “original location”, the town of Old Lyme, Connecticut in 1975. More than 130 years ago, a German physician Alfred Buchwald first discovered the erythema migrans of what is now known to be <i>Lyme disease</i> . | [53]    |
| <i>Ebola disease</i>      | The hemorrhagic fever caused by the filovirus is named after the Ebola River at Legbala, Congo. Yambuku, a town situated 100 kilometers away from Legbala, was the first epicenter in 1976.                                                                | [53–55] |

247 In retrospect, WHO released the latest naming protocols of newly identified infectious  
 248 diseases in 2015, as a supplement to the Reference Guide on the Content Model of the  
 249 ICD-11 alpha drafted by ICD in 2011 [1,56,57]. In May 2019, the World Health  
 250 Assembly (WHA) formally adopted the 11<sup>th</sup> revision of the International Classification  
 251 of Diseases (ICD-11). Specifically, we could crystallize the current recommendations  
 252 into five protocols: avoidance of geographic locations (e.g., countries, cities, regions);  
 253 avoidance of people’s names; avoidance of species/class of animal or food; avoidance of  
 254 cultural, population, industry, or occupational references; and avoidance of terms that  
 255 incite undue fear.

256 In theory, all Member States should follow the nosology-based standard to name a  
 257 newly identified human disease at a later stage. On one hand, the global response has not  
 258 always been smooth in practice. On the other hand, the international framework could not  
 259 offer a one-size-fits-all surveillance mechanism for new designations and the pre-existed  
 260 names. Currently, many inopportune names are widely professed in both scientific  
 261 literature and news outlets without any caution, such as *Ebola*, *Rift Valley fever*, *Japanese*  
 262 *encephalitis*, *Crimean Congo hemorrhagic fever*, *Chagas disease*, *Athlete’s foot*, *miner’s*  
 263 *asthma*, *Marburg disease*, *Legionnaire’ disease*, *Creutzfeldt-Jakob disease*, *monkey pox*,  
 264 *bird flu*, *equine encephalitis*, *paralytic shellfish poisoning*, *swine flu*, and so on [1,32,33].  
 265 Accordingly, after the swine flu of 2009 outbreak, some countries still banned pork  
 266 imports, although *swine flu* cannot be transmitted from pigs at all. Moreover, they are  
 267 scapegoating on the resurgence of stigma in the wake of geopolitical tensions and  
 268 backlashes [53].

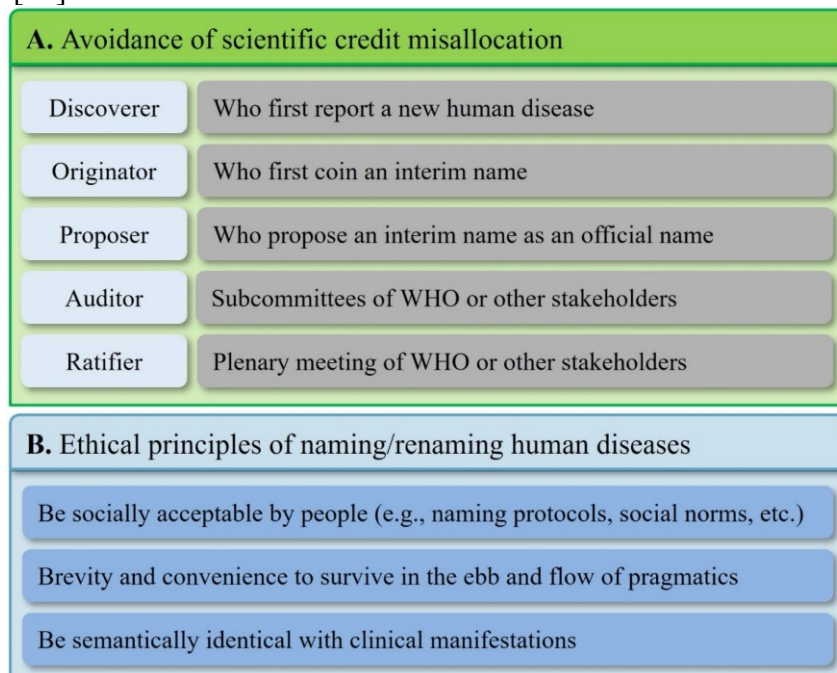

269  
 270

**Figure 2.** Proposal of ethical principles for the latest naming protocols of human diseases.

271 Still, the most pressing challenges concerning the nomenclature of human diseases  
272 depend on well-posed questions, including but not limited to: Who did coin a term to the  
273 designation of a specific disease? Is it still an appropriate name today? How many  
274 inopportune names garner in textbooks without any caution? How to map out an exclusive  
275 substitute for a flawed name? To that end, as a supplement to the current nosology-based  
276 nomenclature standard, we propose the ethical principles for naming a new human disease  
277 or renaming pre-existed nosology, as well as pertinent credit allocation (**Figure 2**).

278 First, as shown in **Figure 2**, many contributors were involved in the general taxonomy  
279 and nomenclature process of human diseases, including the discover(s), originator(s),  
280 proposer(s), auditor(s), and ratifier(s). Without moral discernment, the Matthew effect of  
281 credit misallocations always discourages individual engagement in such practices [58].  
282 Scientists, who precluded the accession of a particular disease, do not always earn their  
283 *bona fide* niches because of credit misallocation in the scientific narratives. Typically, the  
284 unsung originator Dick Thompson first coined the term “*Severe Acute Respiratory*  
285 *Syndrome*” (*SARS*) on 15 March 2003 [59]. His tour-de-force contribution is portrayed as  
286 a trivial anecdote. Similarly, Dr. Jean-Jacques Muyembe-Tamfum, one of the discoverers  
287 of *Ebola disease*, has been unsung until 2015 [60–62]. Thus, figuring out the seminal  
288 motivations of nomenclatures in routine obscurity generally presupposed that we could  
289 track down the original records [63,64]. To corroborate continuous introspection of  
290 previous multifarious findings, historians always find themselves buried in unending  
291 retrieval of tangled contingencies to pinpoint such inherent affiliations in pithy evidence.

292 Second, any proposed name of diseases should balance science, policy, and  
293 communication. Human diseases are often given names by stakeholders outside of the  
294 medical sphere. As a counterexample, *Pneumonoultramicroscopic silicovolcanoconiosis*,  
295 referred to as pneumoconiosis or silicosis, was coined by Everett M. Smith in 1935  
296 [65,66]. Literally, the 45-letter neologism is “a form of a chronic lung disease caused by  
297 the inhalation of fine silicate or quartz dust”, according to the *Oxford English Dictionary*  
298 *Online* (OED Online). Such a long disease entity does not roll off the tongue for efficient  
299 communication, and we should discard similar designations in scientific literature.

300 Third, erasing the stigmas of human diseases is a major public health priority. Whether  
301 name change will ever destigmatize a human disease or not is a cliché. As a case in point,  
302 *Schizophrenia* (also known as Kraepelin’s disease or Bleuler’s syndrome) was first  
303 adopted in 1937 as a translation of the German name *Schizophrenie*. To erase the potential  
304 stigma of *Schizophrenia*, the National Federation of Families with Mentally III in Japan  
305 requested the Japanese Society of Psychiatry and Neurology to replace the official term  
306 *Seishin Bunretsu Byo* with *Togo-Shicchou-Sho* in 2002 [67–69]. In the same vein, South  
307 Korea changed their official term *jeongshin-bunyeol-byung* to *johyun-byung* in 2011 [70].  
308 Subsequently, lexical harm reduction became a bone of contention [68,71–75]. Keep the  
309 twists and turns of naming practices in mind, any novel proposal should go far beyond a  
310 mere semantic equivalent, as well as across cultures and languages. In practice, an  
311 alphanumeric code or a Greek letter is occasionally proposed for naming a pathogen or  
312 disease, but the opposers underline that such designations often introduce new confusion.  
313 For example, “filovirus-associated haemorrhagic fever 1” and “filovirus-associated  
314 haemorrhagic fever 2” were proposed for potential candidates instead of *Marburg disease*  
315 and *Ebola disease*, respectively [32]. Similarly, some Greek letters sound alike when they  
316 are translated into other languages, such as eta (the seventh letter of the Greek alphabet)  
317 and theta (the eighth letter of the Greek alphabet) [76]. With unreached consensus, some  
318 problematic notions are barning in our textbooks to educate generation after generation  
319 without any caution. Nonetheless, reassigning a curated standard name is the corrective



320 approach to destigmatize a flawed name of infectious diseases or noncommunicable  
321 diseases.

322 Last but not at least, sociocultural costs of inappropriate disease names receive little  
323 attention [53]. Scientists mostly work to reduce the physical toll of diseases, although  
324 many of them endorse that disease names could be problematic [32]. Consistent with our  
325 findings, in most instances, inappropriate disease names remain in our blind spot, partially  
326 because the lasting damage they cause is difficult to quantify. Just as the remarks of Dr.  
327 Keiji Fukuda, Assistant Director-General for Health Security of the WHO, “this may  
328 seem like a trivial issue to some, but disease names really do matter to the people who  
329 are directly affected.”[48] Admittedly, empirical research suggested that the common  
330 usage of inappropriate names could produce a vicious circle in public communication and  
331 institutional notions further reinforce collective stigmatization, discrimination, and  
332 prejudice [45,72].

### 333 Looking back and looking forward

334 Framed within the historical coevolution of scientific contexts, understanding the  
335 nosological continuity of diseases remains limit [63,77–80]. As a case in point, the  
336 pathological associations between *German measles* and common synonyms (e.g.,  
337 *morbilli*, *rubeola*, *rubella*, *Rötheln*, etc.) are in the fog of confusion, although the debate  
338 has been going on over a century and a half earlier [7,81–85]. These diachronic discourses  
339 and lexical dynamics also remain unclear [4,7,86–89].

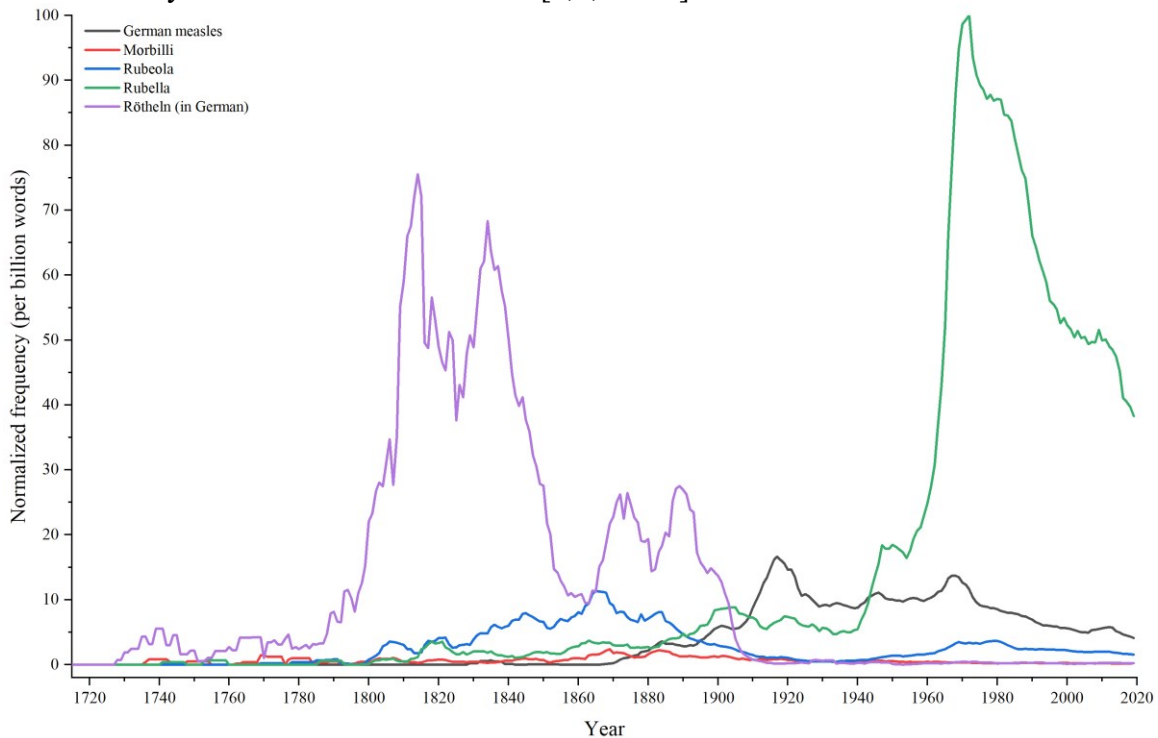

340  
341 **Figure 3.** Historiographical study. Google Books Ngram Corpus (GBNC) facsimiles the  
342 diachronic discourse of *morbilli* (English corpus), *rubeola* (English corpus), *rubella*  
343 (English corpus), *Rötheln* (German corpus), and *German measles* (English corpus) from  
344 1719 to 2019.

345 Nowadays, the Google Books Ngram Corpus (GBNC) is a unique linguistic landscape  
346 that benefits from centuries of development of rich grammatical and lexical resources, as  
347 well as its cultural context [27,90]. Arguably, the lexicographical and historiographical  
348 study promises to articulate the ins and outs of scientific narratives by leveraging the

349 capacity of these rich metadata corpora over four centuries. As shown in **Figure 3**, many  
 350 miscellaneous disease names (e.g., *morbilli*, *morbilli scarlatinosi*, *rötheln*, *feuermasern*,  
 351 *scarlatina morbillosa*, *rubeola notha*, *rosalia idiopathica*, *bastard measles* or *scarlatina*,  
 352 *hybrid measles* or *scarlatina*, etc.) have sunk back into merited oblivion in the ups and  
 353 downs of epic history, whereas *German measles* was destined to become an antiquated  
 354 and anachronistic usage, and *rubella* initiated a herald wave of dominant place after 1944.

355 The nosology of *German measles* and similar diseases is still far from being generally  
 356 recognized, as well as their pathological differentials [64,91]. *Measles* is an old English  
 357 disease name that classical nosologists have vainly attempted to replace by such  
 358 synonyms as *morbilli* and *rubeola* [92]. The English term *measles* was introduced by Dr.  
 359 John of Gaddesden as an equivalent of the Latin term *morbilli* around the 14<sup>th</sup> century  
 360 [63,93,94]. But such designation was generally criticized for “a product of semantic and  
 361 nosographic confusion.”[95] The term *rubeola* originally borrowed from the Latin word  
 362 *Rubeus* (meaning *reddish*) in Avicenna of Bagdad’s writings, is thought to have been  
 363 used for the first time as a translation of the term *measles* [94,96]. Indeed, the great  
 364 majority of scientists recognize *German measles* to be an independent disease.

365 According to the OED Online, the earliest known references to *German measles* date  
 366 back as far as 1856 (**Table 2**). Therefore, it is generally believed that the epidemic entity  
 367 *German measles* was accepted growly after 1856 [7,97,98]. But this is not the case. The  
 368 earliest usages could be stemmed back to about 1814 (**Table 3**).

369 **Table 2.** The debuts of *German measles* and its synonyms according to OED Online.

| Name                  | Debut          | Description                                                                                                                                                                                                                            | References |
|-----------------------|----------------|----------------------------------------------------------------------------------------------------------------------------------------------------------------------------------------------------------------------------------------|------------|
| <i>morbilli</i>       | 1526           | The iuce of it with water of endyuye is good for the chylidren pockes and messeles varioli and <i>morbilli</i> .                                                                                                                       | [99]       |
| <i>rubeola</i>        | 1771           | Exanthemata, or eruptive fevers; comprehending 10 genera, viz. 1. Erysipelas; 2. Peftis; 3. Variola; 4. Varicella; 5. <i>Rubeola</i> ; 6. Miliaria; 7. Scarlatina; 8. Urticaria; 9. Pemphigus; 10. Aphtha.                             | [100]      |
| <i>Rötheln</i>        | 1 January 1840 | I shall therefore use the German word <i>Rötheln</i> to designate the mixed disease under consideration.                                                                                                                               | [101]      |
| <i>German measles</i> | 12 July 1856   | With regard to the name, ‘ <i>German measles</i> ’ – its usual trite designation here – seems unexceptionable for common use.                                                                                                          | [7]        |
| <i>rubella</i>        | 1866           | <i>Rötheln</i> is harsh and foreign to our ears...I therefore venture to propose <i>Rubella</i> as a substitute for <i>Rötheln</i> , or, at any rate, as a name for the disease which it has been my object in this paper to describe. | [102]      |

370 **Table 3.** Historiographical origins of *German measles* and common synonyms.

| Name           | Debut          | Credit                                                                    | Evidence                                                                                                                                                                                                                                                                                                                                     | References |
|----------------|----------------|---------------------------------------------------------------------------|----------------------------------------------------------------------------------------------------------------------------------------------------------------------------------------------------------------------------------------------------------------------------------------------------------------------------------------------|------------|
| <i>rubeola</i> | 1768           | François Boissier de Sauvages de Lacroix (12 May 1706 – 19 February 1767) | Shortly before (1768), the two diseases had been separated by Sauvages in his Nosology, and he was the first to call measles “ <i>rubeola</i> ,” instead of “ <i>morbilli</i> ,” by which name it had always been known before. This new name, “ <i>rubeola</i> ,” was adopted by Cullen in his Nosology, published four years later (1772). | [89,103]   |
| <i>Rötheln</i> | 1 January 1840 | Robert Paterson (1814 – 1889)                                             | I fear that the adoption of the word <i>rubeola</i> for this disease would produce confusion in medical nomenclature. I shall therefore use the German word <i>Rötheln</i> to designate the mixed disease under consideration, in preference to that of <i>rubeola</i> , or the use of a new term.                                           | [101,104]  |

|                       |              |                                    |                                                                                                                                                                                                                                         |           |
|-----------------------|--------------|------------------------------------|-----------------------------------------------------------------------------------------------------------------------------------------------------------------------------------------------------------------------------------------|-----------|
| <i>German measles</i> | 4 April 1814 | William George Maton (1774 – 1835) | On April 4, 1814, Dr. George Maton ... This first identification of <i>German measles</i> as a discrete illness was published one year later, an interval from presentation to publication not dissimilar to that in modern experience. | [105–107] |
| <i>rubella</i>        | 1740         | Friedrich Hoffmann (1660 – 1742)   | Friedrich Hoffmann (1660-1742), ... , Notable among his many clinical descriptions are those of <i>rubella</i> (called “German” measles as a consequence of his description,) chlorosis, and the diseases of the pancreas and liver.    | [108,109] |

371

372 The term *German Measles* was established as a separate disease in 1814 and officially  
 373 recognized by the International Congress of Medicine in 1881. The known clinical  
 374 description came from German physicians Friedrich Hoffmann in 1740, De Bergen in  
 375 1752, and Orlow in 1758, respectively [97,108,109]. Before 1768, for more learned  
 376 occasions, *Rötheln* and *morbilli* seem more decidedly to mark a distinct disease, than any  
 377 other yet proposed [7,89]. French physician Sauvages de Lacroix, who established the  
 378 first methodical nosology for disease classification in 1763 [57,110], first applied the term  
 379 *rubeola* to what had been previously termed *morbilli* in 1768 [89]. And while almost  
 380 immediately after him, the German physicians, Selle, Orlow, and Ziegler, clearly laid  
 381 down the distinctive marks between *rubeola* and *morbilli*. On April 4, 1814, Dr. George  
 382 de Maton read a paper entitled “*Some Account of a Rash Liable to be Mistaken for*  
 383 *Scarlatina*” at the Royal College of Physicians in London [105–107], which results in the  
 384 names *rubella* or *German measles* as a substitute for *Rötheln* [7,86]. Then, the epidemic  
 385 term *German measles* was accepted gradually as a synonym of *rubella*. *German measles*,  
 386 *Rötheln* or *rubeola* per se, was officially ratified as a distinct disease at the 7<sup>th</sup>  
 387 International Medical Congress, London, August 2 to 9, 1881 [88,111–118]. A quarter-  
 388 century later, the term *German Measles* has ultimately become common usage.

389 *Rubella* has been “discovered – and named – multiple times” in the past centuries [119].  
 390 In modern literature, *rubella* has become a *de facto* synonym for *German Measles* after  
 391 1944 [7–16]. In 1740, the English name *rubella* is derived from Latin *rubellus* reddish,  
 392 and the clinical description of *rubella* was first described by Friedrich Hoffmann, the  
 393 author of *Fundamenta Medicinae* [108,109]. Then, *rubella* was considered by Dr. Maton  
 394 to be a mere variant of measles or scarlet fever in 1814 [105,106,120]. Half a century  
 395 later, English surgeon Henry Veale suggested the need to name the discrete disease, and  
 396 formally proposed the name *rubella* as a substitute for *Rötheln* in 1866 [97]. As a major  
 397 human infectious disease, *rubella* must have emerged only in the past 11,000 years for  
 398 which some close relatives may still exist among animals [4,64]. Indeed, consistent with  
 399 the historiographical results (**Figure 3**), *rubella* had been considered of “minor  
 400 importance among the common communicable diseases” until 1940 [121]. Following the  
 401 *rubella* epidemic of 1940, the occurrence of congenital rubella syndrome (CRS) was first  
 402 recognized by Norman McAlister Gregg in 1941 [122,123]. As of 2018, 81 countries  
 403 were verified as having eliminated *rubella* via routine vaccination, and even today *rubella*  
 404 remains endemic in other countries [124].

#### 405 **A heuristic roadmap of exclusive substitute**

406 An exclusive substitution for an anachronistic usage could be a pre-existed synonym, a  
 407 blend word, or a neologism. However, we should curate an exclusive substitute following  
 408 the ethical principles (**Figure 2**). Relatedly, as a heuristic case, we hash out the  
 409 inappropriate name like *German Measles* to quell confusion and avoid stigma. Here, we

410 demonstrate an illustrational approach to determine an exclusive substitution for *German*  
 411 *Measles* without ambiguity.

412 First, the similarity coefficient between words is determined by deep learning models,  
 413 and finally screen out an exclusive substitute for *German Measles* according to the  
 414 semantic similarity scores of word embeddings. In **Figure 4**, the input example is first  
 415 constructed by summing the corresponding token, segment, and position embeddings,  
 416 and then word embeddings go through the BERT base model to obtain the vector  
 417 representations with semantic information. As for the bigram like *German measles*, we  
 418 averaged the individual word vector to get the final word vector. By quantifying the  
 419 cosine similarity scores between the word vectors (**Figure 5**), it turns out that the term  
 420 *rotheln* is substantial equivalence to *rötheln* with the highest semantic fidelity, and the  
 421 results of the BioBERT model and the PubMedBERT model shed light on each other.  
 422 Most notably, as a model in the medical field, the PubMedBERT model maps out that  
 423 *Rubella* should be the exclusive substitution for *German measles* with the highest  
 424 semantic similarity.

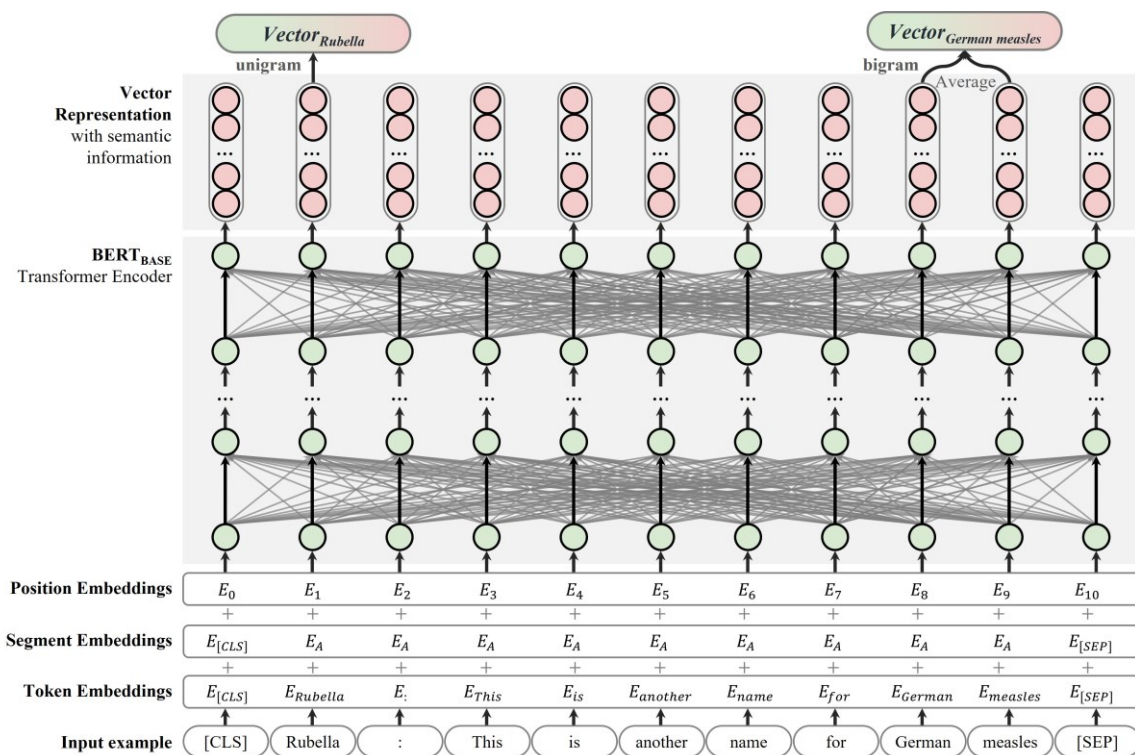

425  
 426

**Figure 4.** Illustrational architecture of the BERT and PubMedBERT models.

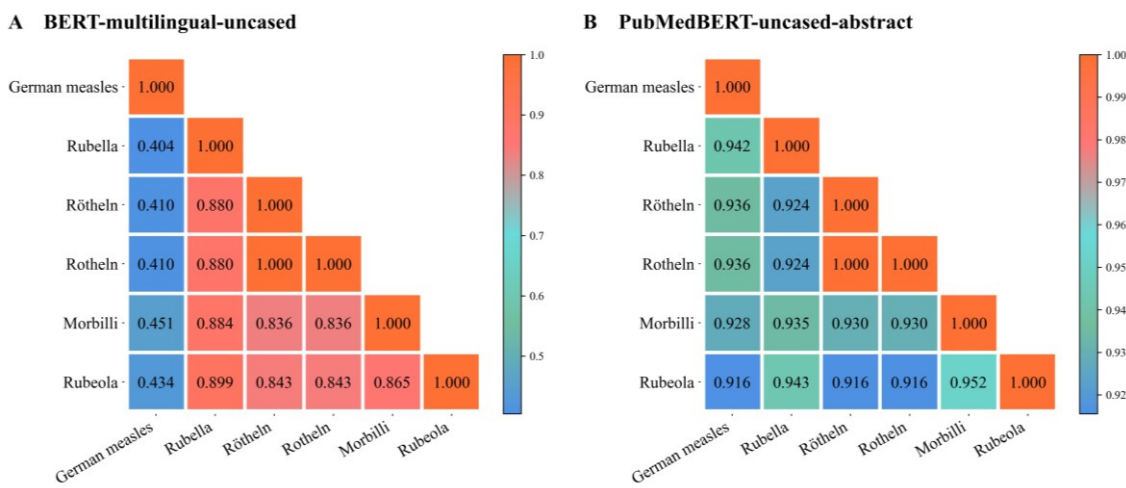

427



428 **Figure 5.** Heatmaps of semantic similarity scores. A, the BERT model and B, the  
 429 PubMedBERT model. The higher scores in the heatmaps, the higher the semantic  
 430 similarity between two synonyms.

431 Second, some case studies are given using the same function with the PubMedBERT  
 432 model for *post-hoc* explanations (**Table 4**). According to syntactical function, in case #1,  
 433 the qualifier ‘this’ refers to *rubella*, so the synonymous sentence of the original sentence  
 434 was that *rubella* is another name for *German measles*. Semantically, *rubella* has an  
 435 equivalence relationship with *German measles*, with a very high semantic relevance  
 436 (0.954). In case #2, *rötheln* has a dependent relationship with *German measles* rather than  
 437 an equivalence relationship. In cases #3 and #4, *morbilli* and *rubeola* tend to the  
 438 appositions of *measles* rather than those of *German measles*. To sum up, the case studies  
 439 further emphasize the high semantic similarity between *rubella* and *German measles*.

440 **Table 4.** Some case studies are retrieved using the same function with the PubMedBERT  
 441 model.

| No. | Examples                                                                                                                                                                                                                                             | Semantic similarity scores |
|-----|------------------------------------------------------------------------------------------------------------------------------------------------------------------------------------------------------------------------------------------------------|----------------------------|
| #1  | <i>Rubella</i> : This is another name for <i>German measles</i> , it causes mental retardation, deafness, and still birth.                                                                                                                           | 0.954                      |
| #2  | All these physicians were German, and the disease was known as <i>Rötheln</i> (from the German name Röteln), hence the common name of “ <i>German measles</i> ”.                                                                                     | 0.903                      |
| #3  | <i>Morbilli</i> sine catarrho has no doubt been described, but it is always held that in these cases our test for measles is awaiting, and that it may be <i>German measles</i> , or something else equally non-protective against a similar attack. | 0.896                      |
| #4  | By the way, <i>German measles</i> is not the same as regular measles ( <i>rubeola</i> ), and having immunity from one illness does not protect you from the other.                                                                                   | 0.892                      |

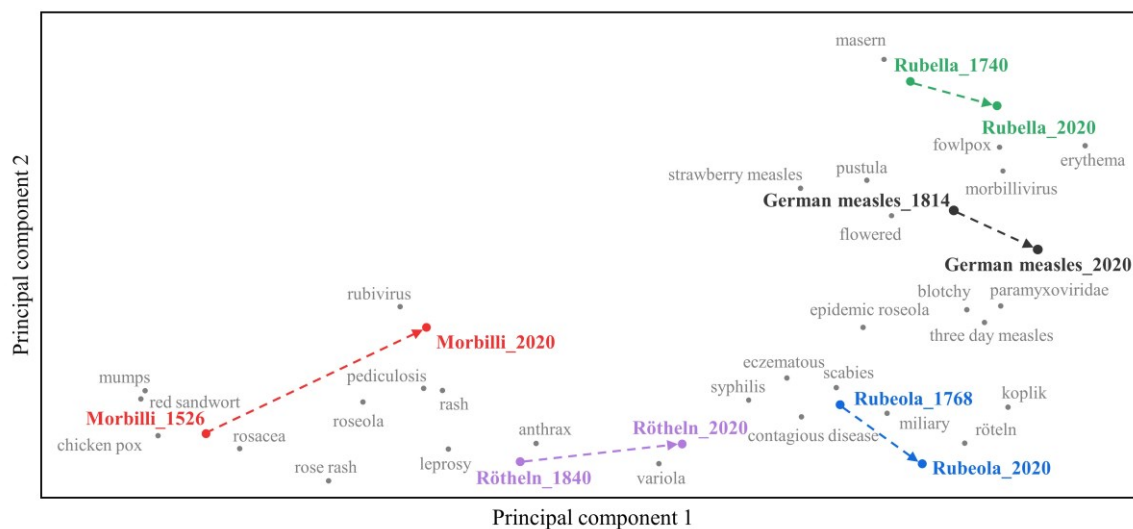

442 **Figure 6.** The historical reconceptualization process of *German measles* and common  
 443 synonyms.  
 444

445 Third, the purpose of the semantic drift experiments is to examine how and to what  
 446 extent the meanings of *German measles*, *morbilli*, *rubeola*, *rubella*, and *rötheln* have  
 447 changed over time. In the meantime, estimate the semantics of words from a particular  
 448 period through historical synonyms. In **Figure 6**, we projected the latent semantic drifts  
 449 of *German measles*, *morbilli*, *rubeola*, *rubella*, and *rötheln* from their debuts to 2020

450 (Table 2 and Table 3). To highlight the cases of semantic drift, the five keywords (in  
451 colors) were shown with their historical synonyms (in gray). The closer two words are to  
452 each other, the more semantically similar they are. For example, the term *Rubella* was  
453 closely associated with the German term *masern* in 1740, and the dominant meaning of  
454 *Rubella* was more semantically similar to the words *fowlpox* and *morbillivirus* in 2020.  
455 As for the term *German measles*, its meaning was closer to *pustula*, *flowered measles*,  
456 and *strawberry measles* when it debuted. However, the semantics of *German measles* is  
457 closer to those of *paramyxoviridae* and *three day measles* today. *Rubeola* changed its  
458 dominant meaning from skin disease *scabies* to *röteln*, and this change approximately  
459 took place between 1768 and 2020. Comparatively, *Rötheln* was more often associated  
460 with the word *variola* rather than *anthrax*, while *Morbilli* was referred to *pediculosis* or  
461 *rash* rather than *rosacea* or *red sandwort*. Therefore, it is found that five keywords have  
462 different degrees of semantic drift over time. Coupled with the previous results (Figure  
463 3), *rubella* is a high-pragmatic-frequency synonym of *German Measles* in recent  
464 literature and tends to survive in due course.

465 In short, our results strongly suggest that *rubella* is a geography-free, high-pragmatic-  
466 frequency, and high-semantic-homology synonym of *German Measles*. In theory, *rubella*  
467 is a pithy substitute for efficient communication according to Zipf's principle of least  
468 effort, comparing with the blend-word *German Measles* [125]. Additionally, it rolls much  
469 easier off the tongue than *German Measles* in daily communication. In retrospect, some  
470 pioneers advocated the discarding of the offensive name *German Measles* before  
471 [91,126,127], as the remarks, "it [*rubella*] is perhaps the best that has been used"[91] and  
472 "a better name for which [*German Measles*] is *rubella*."[127] Such foresight is also  
473 consistent with our experimental results. Therefore, it should be an optimal substitute to  
474 fill in the niche of *German Measles* in practice.

## 475 Discussion

## 476 Conclusion

477 On the anniversary of the best practices of new human infectious diseases announced by  
478 WHO, we take an open mind to appreciate modest introspections and rededications to  
479 celebrate the big moment. The present naming rules could not offer a one-size-fits-all  
480 corrective mechanism, especially for the pre-existed names. In the scientific sphere, much  
481 remains to be learned about the ins and outs of naming practices. Here, we examine what  
482 we need to know and what we need to eliminate the label paradox in due course.

483 Concretely, our infodemiological study first shows that long-standing but flawed  
484 names of human diseases are still going viral in both the scientific community and news  
485 outlets at the cost of social impacts, whatever their seemingly harmless origins. Following  
486 the best practices of WHO, curated names of human diseases should be scientifically  
487 pithy and socially acceptable, with the faith of minimizing marginal impacts on nations,  
488 economies, and people.

489 Our lexicographical and historiographical study could articulate the twists and turns of  
490 naming human diseases over several centuries, penetrate to the essence of nosology, and  
491 finally bridge the gaps of contemporary considerations. Heuristic introspection would  
492 help us to determine pithy names instead of offensive counterparts. Arguably, as an  
493 exemplificative case, it is reasonable that *rubella* should become an exclusive usage  
494 substitute for *German Measles* with the same clinical manifestations and equivalent  
495 semantics. Thus, our proposed principles and approaches are expected to provide  
496 hallmark remedial mechanisms for current nosology-based standards and reframe far-  
497 reaching discussions on the nomenclature of human diseases.

## 498 **Data availability**

499 The synthetic data generated in this study and custom code supporting this study are  
500 available at GitHub ([https://github.com/YaChen8/Naming\\_human\\_disease](https://github.com/YaChen8/Naming_human_disease)).

## 501 **References**

- 502 1. WHO. World Health Organization Best Practices for the Naming of New Human  
503 Infectious Diseases [Internet]. 2015. p. 1–3. Available from:  
504 [https://www.who.int/topics/infectious\\_diseases/naming-new-diseases/en/](https://www.who.int/topics/infectious_diseases/naming-new-diseases/en/)
- 505 2. Fukuda K, Wang R, Vallat B. Naming diseases: First do no harm. *Science*  
506 [Internet] 2015 May 8;348(6235):643–643. [doi: 10.1126/science.348.6235.643]
- 507 3. Chandrashekhar V. The burden of stigma. *Science* [Internet] 2020 Sep  
508 18;369(6510):1419–1423. [doi: 10.1126/science.369.6510.1419]
- 509 4. Bennett AJ, Paskey AC, Ebinger A, Pfaff F, Priemer G, Höper D, Breithaupt A,  
510 Heuser E, Ulrich RG, Kuhn JH, Bishop-Lilly KA, Beer M, Goldberg TL. Relatives  
511 of rubella virus in diverse mammals. *Nature* [Internet] 2020 Oct  
512 15;586(7829):424–428. [doi: 10.1038/s41586-020-2812-9]
- 513 5. Gibbons A. Newly found viruses suggest rubella originated in animals. *Science*  
514 [Internet] 2020 Oct 9;370(6513):157–157. [doi: 10.1126/science.370.6513.157]
- 515 6. Gibbons A. Newly discovered viruses suggest ‘German measles’ jumped from  
516 animals to humans. *Science* [Internet] 2020 Oct 7; [doi: 10.1126/science.abf1520]
- 517 7. Philo Scotus. The Rubeola Epidemic. *Lancet* [Internet] 1856 Jul;68(1715):57. [doi:  
518 10.1016/S0140-6736(02)76420-9]
- 519 8. Wesselhoef C. Rubella (German Measles). *N Engl J Med* [Internet] 1947 Jun  
520 19;236(25):943–950. [doi: 10.1056/NEJM194706192362506]
- 521 9. Wesselhoef C. Rubella (German Measles). *N Engl J Med* [Internet] 1947 Jun  
522 26;236(26):978–988. [doi: 10.1056/NEJM194706262362605]
- 523 10. Wesselhoef C. Rubella (German Measles) and Congenital Deformities. *N Engl J*  
524 *Med* [Internet] 1949 Feb 17;240(7):258–261. [doi:  
525 10.1056/NEJM194902172400706]
- 526 11. Dudgeon JA. Immunization against Rubella. *Nature* [Internet] 1969  
527 Aug;223(5207):674–676. [doi: 10.1038/223674a0]
- 528 12. Eichhorn MM. Rubella: Will Vaccination Prevent Birth Defects? *Science*  
529 [Internet] 1971 Aug 20;173(3998):710–711. [doi: 10.1126/science.173.3998.710-  
530 a]
- 531 13. Eichhorn MM. Rubella: Will Vaccination Prevent Birth Defects? *Science*  
532 [Internet] 1971 Aug 20;173(3998):710–711. [doi: 10.1126/science.173.3998.710-  
533 b]
- 534 14. Donald MW, Goff WR. Attention-Related Increases in Cortical Responsivity  
535 Dissociated from the Contingent Negative Variation. *Science* [Internet] 1971 Jun  
536 11;172(3988):1163–1166. [doi: 10.1126/science.172.3988.1163]
- 537 15. Maugh TH. Diabetes: Epidemiology Suggests a Viral Connection. *Science*  
538 [Internet] 1975 Apr 25;188(4186):347–351. [doi: 10.1126/science.188.4186.347]
- 539 16. Gordis L, Gold E. Privacy, confidentiality, and the use of medical records in  
540 research. *Science* [Internet] 1980 Jan 11;207(4427):153–156. [doi:  
541 10.1126/science.7350648]
- 542 17. Jardetzky TS, Lamb RA. A class act. *Nature* [Internet] 2004 Jan;427(6972):307–  
543 308. [doi: 10.1038/427307a]
- 544 18. Wadman M. The physician whose 1964 vaccine beat back rubella is working to  
545 defeat the new coronavirus. *Science* [Internet] 2020 Mar 21; [doi:  
546 10.1126/science.abb8290]

- 547 19. Shimizu K. 2019-nCoV, fake news, and racism. *Lancet* [Internet] 2020  
548 Feb;395(10225):685–686. [doi: 10.1016/S0140-6736(20)30357-3]
- 549 20. The Lancet. COVID-19: fighting panic with information. *Lancet* [Internet] 2020  
550 Feb;395(10224):537. [doi: 10.1016/S0140-6736(20)30379-2]
- 551 21. Lazer D, Pentland A, Adamic L, Aral S, Barabasi A-L, Brewer D, Christakis N,  
552 Contractor N, Fowler J, Gutmann M, Jebara T, King G, Macy M, Roy D, Van  
553 Alstyne M. Computational Social Science. *Science* [Internet] 2009 Feb  
554 6;323(5915):721–723. [doi: 10.1126/science.1167742]
- 555 22. Lazer DMJ, Pentland A, Watts DJ, Aral S, Athey S, Contractor N, Freelon D,  
556 Gonzalez-Bailon S, King G, Margetts H, Nelson A, Salganik MJ, Strohmaier M,  
557 Vespignani A, Wagner C. Computational social science: Obstacles and  
558 opportunities. *Science* [Internet] 2020 Aug 28;369(6507):1060–1062. [doi:  
559 10.1126/science.aaz8170]
- 560 23. Page MJ, Moher D, Bossuyt PM, Boutron I, Hoffmann TC, Mulrow CD, Shamseer  
561 L, Tetzlaff JM, Akl EA, Brennan SE, Chou R, Glanville J, Grimshaw JM,  
562 Hróbjartsson A, Lalu MM, Li T, Loder EW, Mayo-Wilson E, McDonald S,  
563 McGuinness LA, Stewart LA, Thomas J, Tricco AC, Welch VA, Whiting P,  
564 McKenzie JE. PRISMA 2020 explanation and elaboration: updated guidance and  
565 exemplars for reporting systematic reviews. *BMJ* [Internet] 2021 Mar 29;n160.  
566 [doi: 10.1136/bmj.n160]
- 567 24. Hu Z, Yang Z, Li Q, Zhang A. The COVID-19 Infodemic: Infodemiology Study  
568 Analyzing Stigmatizing Search Terms. *J Med Internet Res* [Internet] 2020 Nov  
569 16;22(11):e22639. PMID:33156807
- 570 25. Leetaru KH, Schrodt PA. A 30-Year Georeferenced Global Event Database: The  
571 Global Database of Events, Language, and Tone (GDELT). 54th Annu Conv Int  
572 Stud Assoc [Internet] San Francisco, California, USA; 2013. p. 1–51. Available  
573 from: <http://data.gdelproject.org/documentation/ISA.2013.GDELT.pdf>
- 574 26. Wang W, Kennedy R, Lazer D, Ramakrishnan N. Growing pains for global  
575 monitoring of societal events. *Science* [Internet] 2016 Sep 30;353(6307):1502–  
576 1503. [doi: 10.1126/science.aaf6758]
- 577 27. Michel J-B, Shen YK, Aiden AP, Veres A, Gray MK, Pickett JP, Hoiberg D,  
578 Clancy D, Norvig P, Orwant J, Pinker S, Nowak MA, Aiden EL. Quantitative  
579 Analysis of Culture Using Millions of Digitized Books. *Science* [Internet] 2011  
580 Jan 14;331(6014):176–182. [doi: 10.1126/science.1199644]
- 581 28. Devlin J, Chang M-W, Lee K, Toutanova K. BERT: Pre-training of Deep  
582 Bidirectional Transformers for Language Understanding. *Proc 2019 Conf North*  
583 *Am* [Internet] Stroudsburg, PA, USA: Association for Computational Linguistics;  
584 2019. p. 4171–4186. [doi: 10.18653/v1/N19-1423]
- 585 29. Gu Y, Tinn R, Cheng H, Lucas M, Usuyama N, Liu X, Naumann T, Gao J, Poon  
586 H. Domain-Specific Language Model Pretraining for Biomedical Natural  
587 Language Processing. 2020 Jul 30; Available from:  
588 <http://arxiv.org/abs/2007.15779>
- 589 30. Li Y, Engelthaler T, Siew CSQ, Hills TT. The Macroscope: A tool for examining  
590 the historical structure of language. *Behav Res Methods* [Internet] 2019 Aug  
591 11;51(4):1864–1877. [doi: 10.3758/s13428-018-1177-6]
- 592 31. Li Y, Hills T, Hertwig R. A brief history of risk. *Cognition* [Internet] 2020  
593 Oct;203:104344. [doi: 10.1016/j.cognition.2020.104344]
- 594 32. Kupferschmidt K. Rules of the name. *Science* [Internet] 2015 May  
595 15;348(6236):745–745. [doi: 10.1126/science.348.6236.745]



- 596 33. Kupferschmidt K. Discovered a disease? WHO has new rules for avoiding  
597 offensive names. *Science* [Internet] 2015 May 11; [doi: 10.1126/science.aac4575]  
598 34. Enserink M. Amid Heightened Concerns, New Name for Novel Coronavirus  
599 Emerges. *Science* [Internet] 2013 May 10;340(6133):673–673. PMID:23661733  
600 35. Dowell SF, Bresee JS. Pandemic lessons from Iceland. *Proc Natl Acad Sci*  
601 [Internet] 2008 Jan 29;105(4):1109–1110. [doi: 10.1073/pnas.0711535105]  
602 36. Hoppe T. “Spanish Flu”: When Infectious Disease Names Blur Origins and  
603 Stigmatize Those Infected. *Am J Public Health* [Internet] 2018  
604 Nov;108(11):1462–1464. [doi: 10.2105/AJPH.2018.304645]  
605 37. Anonymous. Have we had Hong Kong flu before? *Lancet* [Internet] 1969  
606 May;293(7601):929–930. [doi: 10.1016/S0140-6736(69)92556-2]  
607 38. Peckham R. Viral surveillance and the 1968 Hong Kong flu pandemic. *J Glob Hist*  
608 [Internet] 2020 Nov 6;15(3):444–458. [doi: 10.1017/S1740022820000224]  
609 39. Chang, BS C, Salerno, MSc A, Hsu, MD, MPH EB. Perspectives on xenophobia  
610 during epidemics and implications for emergency management. *J Emerg Manag*  
611 [Internet] 2020 Dec 10;18(7):23–29. [doi: 10.5055/jem.2020.0521]  
612 40. Wexler A. Stigma, history, and Huntington’s disease. *Lancet* [Internet] 2010  
613 Jul;376(9734):18–19. [doi: 10.1016/S0140-6736(10)60957-9]  
614 41. Rawlins M. Huntington’s disease out of the closet? *Lancet* [Internet] 2010  
615 Oct;376(9750):1372–1373. [doi: 10.1016/S0140-6736(10)60974-9]  
616 42. Spinney L. Uncovering the true prevalence of Huntington’s disease. *Lancet Neurol*  
617 [Internet] 2010 Aug;9(8):760–761. [doi: 10.1016/S1474-4422(10)70160-5]  
618 43. Editorial. Dispelling the stigma of Huntington’s disease. *Lancet Neurol* [Internet]  
619 2010 Aug;9(8):751. [doi: 10.1016/S1474-4422(10)70170-8]  
620 44. Hyman SE. The Unconscionable Gap Between What We Know and What We Do.  
621 *Sci Transl Med* [Internet] 2014 Sep 10;6(253):1–4. [doi:  
622 10.1126/scitranslmed.3010312]  
623 45. Gollwitzer A, Marshall J, Wang Y, Bargh JA. Relating pattern deviancy aversion  
624 to stigma and prejudice. *Nat Hum Behav* [Internet] 2017 Dec 27;1(12):920–927.  
625 [doi: 10.1038/s41562-017-0243-x]  
626 46. Soroka S, Fournier P, Nir L. Cross-national evidence of a negativity bias in  
627 psychophysiological reactions to news. *Proc Natl Acad Sci* [Internet] 2019 Sep  
628 17;116(38):18888–18892. [doi: 10.1073/pnas.1908369116]  
629 47. Pescosolido BA, Martin JK. The Stigma Complex. *Annu Rev Sociol* [Internet]  
630 2015 Aug 14;41(1):87–116. [doi: 10.1146/annurev-soc-071312-145702]  
631 48. WHO. WHO issues best practices for naming new human infectious diseases.  
632 2015; Available from: [https://www.who.int/news/item/08-05-2015-who-issues-](https://www.who.int/news/item/08-05-2015-who-issues-best-practices-for-naming-new-human-infectious-diseases)  
633 [best-practices-for-naming-new-human-infectious-diseases](https://www.who.int/news/item/08-05-2015-who-issues-best-practices-for-naming-new-human-infectious-diseases)  
634 49. WHO. A guide to preventing and addressing social stigma [Internet]. Available  
635 from: [https://www.who.int/docs/default-source/coronaviruse/covid19-stigma-](https://www.who.int/docs/default-source/coronaviruse/covid19-stigma-guide.pdf)  
636 [guide.pdf](https://www.who.int/docs/default-source/coronaviruse/covid19-stigma-guide.pdf)  
637 50. Editorial. Stop the coronavirus stigma now. *Nature* [Internet] 2020 Apr  
638 9;580(7802):165–165. [doi: 10.1038/d41586-020-01009-0]  
639 51. London AJ, Kimmelman J. Against pandemic research exceptionalism. *Science*  
640 [Internet] 2020 May 1;368(6490):476–477. [doi: 10.1126/science.abc1731]  
641 52. Olson DR, Simonsen L, Edelson PJ, Morse SS. Epidemiological evidence of an  
642 early wave of the 1918 influenza pandemic in New York City. *Proc Natl Acad Sci*  
643 [Internet] 2005 Aug 2;102(31):11059–11063. [doi: 10.1073/pnas.0408290102]  
644 53. Editorial. Calling it what it is. *Nat Genet* [Internet] 2020 Apr 3;52(4):355–355.  
645 [doi: 10.1038/s41588-020-0617-2]

- 646 54. Fischer LS, Mansergh G, Lynch J, Santibanez S. Addressing Disease-Related  
647 Stigma During Infectious Disease Outbreaks. *Disaster Med Public Health Prep*  
648 [Internet] 2019 Dec 3;13(5–6):989–994. [doi: 10.1017/dmp.2018.157]
- 649 55. WHO. Ebola haemorrhagic fever in Zaire, 1976. *Bull World Health Organ*  
650 [Internet] 1978 Sep 12;56(2):271–93. PMID:307456
- 651 56. WHO. Reference Guide on the Content Model of the ICD-11 alpha [Internet].  
652 2011. p. 59. Available from:  
653 [https://www.who.int/classifications/icd/revision/Content\\_Model\\_Reference\\_Gui](https://www.who.int/classifications/icd/revision/Content_Model_Reference_Guide.January_2011.pdf)  
654 [de.January\\_2011.pdf](https://www.who.int/classifications/icd/revision/Content_Model_Reference_Guide.January_2011.pdf)
- 655 57. Kveim Lie A, Greene JA. From Ariadne’s Thread to the Labyrinth Itself —  
656 Nosology and the Infrastructure of Modern Medicine. Malina D, editor. *N Engl J*  
657 *Med* [Internet] 2020 Mar 26;382(13):1273–1277. [doi:  
658 10.1056/NEJMms1913140]
- 659 58. Fortunato S, Bergstrom CT, Börner K, Evans JA, Helbing D, Milojević S, Petersen  
660 AM, Radicchi F, Sinatra R, Uzzi B, Vespignani A, Waltman L, Wang D, Barabási  
661 A-L. Science of science. *Science* [Internet] 2018 Mar 2;359(6379):eaao0185. [doi:  
662 10.1126/science.aao0185]
- 663 59. Enserink M. War Stories. *Science* [Internet] 2013 Mar 15;339(6125):1264–1268.  
664 [doi: 10.1126/science.339.6125.1264]
- 665 60. Honigsbaum M. Jean-Jacques Muyembe-Tamfum: Africa’s veteran Ebola hunter.  
666 *Lancet* [Internet] 2015 Jun;385(9986):2455. [doi: 10.1016/S0140-6736(15)61128-  
667 X]
- 668 61. Jean-Jacques Muyembe Tamfum: a life’s work on Ebola. *Bull World Health Organ*  
669 [Internet] 2018 Dec 1;96(12):804–805. [doi: 10.2471/BLT.18.031218]
- 670 62. Kuhn JH, Adachi T, Adhikari NKJ, Arribas JR, Bah IE, Bausch DG, Bhadelia N,  
671 Borchert M, Brantsæter AB, Brett-Major DM, Burgess TH, Chertow DS, Chute  
672 CG, Cieslak TJ, Colebunders R, Crozier I, Davey RT, de Clerck H, Delgado R,  
673 Evans L, Fallah M, Fischer WA, Fletcher TE, Fowler RA, Grünewald T, Hall A,  
674 Hewlett A, Hoepelman AIM, Houlihan CF, Ippolito G, Jacob ST, Jacobs M, Jakob  
675 R, Jacqueroz FA, Kaiser L, Kalil AC, Kamara RF, Kapetshi J, Klenk H-D,  
676 Kobinger G, Kortepeter MG, Kraft CS, Kratz T, Bosa HSK, Lado M, Lamontagne  
677 F, Lane HC, Lobel L, Lutwama J, Lyon GM, Massaquoi MBF, Massaquoi TA,  
678 Mehta AK, Makuma VM, Murthy S, Musoke TS, Muyembe-Tamfum J-J,  
679 Nakyeyune P, Nanclares C, Nanyunja M, Nsio-Mbeta J, O’Dempsey T, Pawęska  
680 JT, Peters CJ, Piot P, Rapp C, Renaud B, Ribner B, Sabeti PC, Schieffelin JS,  
681 Slenczka W, Soka MJ, Sprecher A, Strong J, Swanepoel R, Uyeki TM, van Herp  
682 M, Vetter P, Wohl DA, Wolf T, Wolz A, Wurie AH, Yoti Z. New filovirus disease  
683 classification and nomenclature. *Nat Rev Microbiol* [Internet] 2019 May  
684 29;17(5):261–263. [doi: 10.1038/s41579-019-0187-4]
- 685 63. Sykes W. On the origin and history of some disease-names. *Lancet* [Internet] 1896  
686 Apr;147(3789):1007–1010. [doi: 10.1016/S0140-6736(01)39505-3]
- 687 64. Wolfe ND, Dunavan CP, Diamond J. Origins of major human infectious diseases.  
688 *Nature* [Internet] 2007 May;447(7142):279–283. [doi: 10.1038/nature05775]
- 689 65. Trisnawati I, Budiono E, Sumardi, Setiadi A. Traumatic Inhalation due to Merapi  
690 Volcanic Ash. *Acta Med Indones* [Internet] 2015 Jul;47(3):238–43.  
691 PMID:26586390
- 692 66. Burhan E, Mukminin U. A systematic review of respiratory infection due to air  
693 pollution during natural disasters. *Med J Indones* [Internet] 2020 Mar 20;29(1):11–  
694 8. [doi: 10.13181/mji.oa.204390]

- 695 67. Kim Y. Renaming the term schizophrenia in Japan. *Lancet* [Internet] 2002  
696 Sep;360(9336):879. [doi: 10.1016/S0140-6736(02)09987-7]
- 697 68. Maruta T, Volpe U, Gaebel W, Matsumoto C, Iimori M. Should schizophrenia still  
698 be named so? *Schizophr Res* [Internet] 2014 Jan;152(1):305–306. [doi:  
699 10.1016/j.schres.2013.11.005]
- 700 69. Sartorius N. Stigma: what can psychiatrists do about it? *Lancet* [Internet] 1998  
701 Sep;352(9133):1058–1059. [doi: 10.1016/S0140-6736(98)08008-8]
- 702 70. Park J-H, Choi Y-M, Kim B, Lee D-W, Gim M-S. Use of the Terms  
703 “Schizophrenia” and “Schizophrenic” in the South Korean News Media: A  
704 Content Analysis of Newspapers and News Programs in the Last 10 Years.  
705 *Psychiatry Investig* [Internet] 2012;9(1):17. [doi: 10.4306/pi.2012.9.1.17]
- 706 71. George B, Klijn A. A modern name for schizophrenia (PSS) would diminish self-  
707 stigma. *Psychol Med* [Internet] 2013 Jul 17;43(7):1555–1557. [doi:  
708 10.1017/S0033291713000895]
- 709 72. Porter R. Can the stigma of mental illness be changed? *Lancet* [Internet] 1998  
710 Sep;352(9133):1049–1050. [doi: 10.1016/S0140-6736(98)07155-4]
- 711 73. Corrigan PW. Erasing Stigma Is Much More Than Changing Words. *Psychiatr*  
712 *Serv* [Internet] 2014 Oct;65(10):1263–1264. [doi: 10.1176/appi.ps.201400113]
- 713 74. Koike S, Yamaguchi S, Ojio Y, Ohta K, Ando S. Effect of Name Change of  
714 Schizophrenia on Mass Media Between 1985 and 2013 in Japan: A Text Data  
715 Mining Analysis. *Schizophr Bull* [Internet] 2016 May;42(3):552–559. [doi:  
716 10.1093/schbul/sbv159]
- 717 75. Corrigan PW. Beware the Word Police. *Psychiatr Serv* [Internet] 2019  
718 Mar;70(3):234–236. [doi: 10.1176/appi.ps.201800369]
- 719 76. Editorial. Embrace the WHO’s new naming system for coronavirus variants.  
720 *Nature* [Internet] 2021 Jun 10;594(7862):149–149. [doi: 10.1038/d41586-021-  
721 01508-8]
- 722 77. Anonymous. The nomenclature of diseases: I. *BMJ* 1868;2(403):316–318.
- 723 78. Anonymous. The nomenclature of diseases:II. *BMJ* 1869;2(406):396–397.
- 724 79. Anonymous. The nomenclature of diseases:III. *BMJ* 1869;1(420):55–57.
- 725 80. Philipson GH. On the Registration of Diseases. *BMJ* [Internet] 1869 Nov  
726 6;2(462):485–487. [doi: 10.1136/bmj.2.462.485]
- 727 81. Willshire WH. The Epidemic of Rubeola. *Lancet* [Internet] 1856  
728 Jun;67(1710):640. [doi: 10.1016/S0140-6736(02)55500-8]
- 729 82. Kesteven WB. The Epidemic of Rubeola. *Lancet* [Internet] 1856  
730 Jun;67(1711):671–672. [doi: 10.1016/S0140-6736(02)55536-7]
- 731 83. Tripe JW. The Rubeola Epidemic. *Lancet* [Internet] 1856 Jun;67(1713):719–720.  
732 [doi: 10.1016/S0140-6736(02)59408-3]
- 733 84. Scattergood T. Morbilli and Rubeola. *BMJ* [Internet] 1870 Jan 29;1(474):121–121.  
734 [doi: 10.1136/bmj.1.474.121]
- 735 85. Squire W. Remarks on Epidemic Roseola; Rosella, Rosalia, or Rubeola. *BMJ*  
736 [Internet] 1870 Jan 29;1(474):99–100. [doi: 10.1136/bmj.1.474.99]
- 737 86. Forbes JA. Rubella: Historical Aspects. *Arch Pediatr Adolesc Med* [Internet] 1969  
738 Jul 1;118(1):5–11. [doi: 10.1001/archpedi.1969.02100040007002]
- 739 87. Ziring PR, Florman AL, Cooper LZ. The Diagnosis of Rubella. *Pediatr Clin North*  
740 *Am* [Internet] 1971 Feb;18(1):87–97. [doi: 10.1016/S0031-3955(16)32524-X]
- 741 88. Banatvala JE, Brown D. Rubella. *Lancet* [Internet] 2004 Apr;363(9415):1127–  
742 1137. [doi: 10.1016/S0140-6736(04)15897-2]
- 743 89. Murchison C. Clinical Lectures on Medicine. *Lancet* [Internet] 1870  
744 Oct;96(2461):595–598. [doi: 10.1016/S0140-6736(02)79936-4]

- 745 90. Lin Y, Michel J, Aiden EL, Orwant J, Brockman W, Petrov S. Syntactic  
746 Annotations for the Google Books Ngram Corpus. Proc of the 50th Annu Meet  
747 of the Assoc Comput Linguist Jeju, Republic of Korea: Association for  
748 Computational Linguistics, Stroudsburg, PA, USA; 2012. p. 169–174.
- 749 91. Putnam CP. Is German Measles (Rotheln or Rubella) an Independent Disease?  
750 *Bost Med Surg J* [Internet] 1893 Jul 13;129(2):30–33. [doi:  
751 10.1056/NEJM189307131290202]
- 752 92. Rota PA, Moss WJ, Takeda M, de Swart RL, Thompson KM, Goodson JL.  
753 Measles. *Nat Rev Dis Prim* [Internet] 2016 Dec 22;2(1):16049. [doi:  
754 10.1038/nrdp.2016.49]
- 755 93. Gastel B. Measles: A Potentially Finite History. *J Hist Med Allied Sci* [Internet]  
756 1973;28(1):34–44. [doi: 10.1093/jhmas/XXVIII.1.34]
- 757 94. Drutz JE. Measles: Its history and its eventual eradication. *Semin Pediatr Infect*  
758 *Dis* [Internet] 2001 Oct;12(4):315–322. [doi: 10.1053/spid.2001.26640]
- 759 95. Rosen G. A history of public health. 1st ed. New York: M.D. Publications; 1958.
- 760 96. Panum PL. Observations Made During the Epidemic of Measles on the Faroe  
761 Islands in the Year 1846. Copenhagen: Bibliothek for Laeger; 1847.
- 762 97. Veale H. History of an Epidemic of R $\ddot{o}$ theln, with Observations on Its Pathology.  
763 *Edinb Med J* [Internet] 1866 Nov;12(5):404–414. PMID:29646314
- 764 98. Tomkins H. The Diagnosis of R $\ddot{o}$ theln. *BMJ* [Internet] 1880 May 29;1(1013):808–  
765 808. [doi: 10.1136/bmj.1.1013.808]
- 766 99. Treveris P. The Grete Herball: a tendril of ancient herbal traditions reaching into  
767 16th century England. 1st ed. Treveris P, editor. London; 1526.
- 768 100. Encyclopaedia Britannica. 1st ed. Edinburgh, Scotland: A. Bell and C.  
769 Macfarquhar; 1771.
- 770 101. Paterson R. Observations on Corpora Lutea: Part I. *Edinburgh Med Surg J*  
771 [Internet] 1840 Jan 1;53(142):49–67. PMID:30331001
- 772 102. Veale H. On the Etiology of Stricture of the Urethra. *Edinb Med J* [Internet] 1867  
773 Jan;12(7):602–606. PMID:29646509
- 774 103. Shulman ST. The History of Pediatric Infectious Diseases. *Pediatr Res* [Internet]  
775 2004 Jan;55(1):163–176. [doi: 10.1203/01.PDR.0000101756.93542.09]
- 776 104. Paterson R. An Account of the R $\ddot{o}$ theln of German Authors, Together with a Few  
777 Observations on the Disease as It Has Been Seen to Prevail in Leith and Its  
778 Neighbourhood. *Edinburgh Med Surg J* [Internet] 1840 Apr 1;53(143):381–393.  
779 PMID:30330988
- 780 105. Maton WG. Some account of a rash liable to be mistaken for scarlatina. *Med Trans*  
781 *Coll Physicians* 1815;5:149–165.
- 782 106. Cooper LZ. The history and medical consequences of rubella. *Rev Infect Dis*  
783 1985;7:2–10. PMID:3890105
- 784 107. Grimwood RM, Holmes EC, Geoghegan JL. A Novel Rubi-Like Virus in the  
785 Pacific Electric Ray (*Tetronarce californica*) Reveals the Complex Evolutionary  
786 History of the Matonaviridae. *Viruses* [Internet] 2021 Mar 31;13(4):585. [doi:  
787 10.3390/v13040585]
- 788 108. Ackerknecht EH. A short history of medicine. Baltimore, Maryland: Johns Hopkins  
789 University Press; 1982. ISBN:978-0-8018-2726-6
- 790 109. Neuburger M. Some relations between British and German medicine in the first  
791 half of the eighteenth century. *Bull Hist Med* 1945;17(3):217–228.
- 792 110. Hess V, Mendelsohn JA. Sauvages' Paperwork: How Disease Classification Arose  
793 from Scholarly Note-Taking. *Early Sci Med* [Internet] 2014 Nov 27;19(5):471–  
794 503. [doi: 10.1163/15733823-00195p05]



- 795 111. International Congress of Medicine. Transactions of the International Congress of  
796 Medicine. Trans Int Congr Med London; 1881. p. 14–34.
- 797 112. International Medical Congress. Lancet [Internet] 1881 Mar;117(3001):392–393.  
798 [doi: 10.1016/S0140-6736(02)33362-2]
- 799 113. Billings JS. International Medical Congress, London, 1881. Bost Med Surg J  
800 [Internet] 1881 Sep 8;105(10):217–222. [doi: 10.1056/NEJM188109081051001]
- 801 114. International Medical Congress. Lancet [Internet] 1881 Mar;117(3003):478. [doi:  
802 10.1016/S0140-6736(02)13222-3]
- 803 115. The International Medical Congress. Nature [Internet] 1881 Aug;24(615):338–  
804 339. [doi: 10.1038/024338a0]
- 805 116. The International Medical Congress. BMJ [Internet] 1881 Aug 13;2(1076):300–  
806 305. [doi: 10.1136/bmj.2.1076.300]
- 807 117. The International Medical Congress. BMJ 1881;2(1082):518–530. [doi:  
808 10.1016/S0140-6736(01)93495-6]
- 809 118. International Medical Congress. BMJ [Internet] 1881 Oct 1;2(1083):545–566.  
810 [doi: 10.1136/bmj.2.1083.545]
- 811 119. Barnett R. Rubella. Lancet [Internet] 2017 Apr;389(10077):1386. [doi:  
812 10.1016/S0140-6736(17)30890-5]
- 813 120. Warrack JS. The differential diagnosis of scarlet fever, measles, and rubella. BMJ  
814 [Internet] 1918 Nov 2;2(3018):486–488. [doi: 10.1136/bmj.2.3018.486]
- 815 121. Editorial. Rubella in an Isolated Community. N Engl J Med [Internet] 1957 Feb  
816 14;256(7):323–324. [doi: 10.1056/NEJM195702142560712]
- 817 122. Gregg NM. Congenital Cataract Following German Measles in the Mother.  
818 Epidemiol Infect [Internet] 1991 Aug 15;107(1):3–14. [doi:  
819 10.1017/S0950268800048627]
- 820 123. Lambert N, Strebel P, Orenstein W, Icenogle J, Poland GA. Rubella. Lancet  
821 [Internet] 2015 Jun;385(9984):2297–2307. [doi: 10.1016/S0140-6736(14)60539-  
822 0]
- 823 124. WHO. The Measles & Rubella Initiative supports implementation of the Measles  
824 & Rubella Strategic Framework 2021-2030 [Internet]. 2020. Available from:  
825 [https://s3.amazonaws.com/wp-agility2/measles/wp-](https://s3.amazonaws.com/wp-agility2/measles/wp-content/uploads/2020/11/measles_rubella_initiative_final_print.pdf)  
826 [content/uploads/2020/11/measles\\_rubella\\_initiative\\_final\\_print.pdf](https://s3.amazonaws.com/wp-agility2/measles/wp-content/uploads/2020/11/measles_rubella_initiative_final_print.pdf)
- 827 125. Zipf GK. Human Behavior and the Principle of Least Effort: An Introduction to  
828 Human Ecology. Cambridge, Massachusetts: Addison-Wesley Press; 1949.  
829 ISBN:4444006101174
- 830 126. Editorial. Reports of Meetings. N Engl J Med [Internet] 1941 Jan 30;224(5):216–  
831 217. [doi: 10.1056/NEJM194101302240517]
- 832 127. Editorial. Miscellany. N Engl J Med [Internet] 1931 Apr 30;204(18):913–947.  
833 [doi: 10.1056/NEJM193104302041806]

834

### 835 Abbreviations

- 836 **BERT:** Bidirectional Encoder Representations from Transformers
- 837 **COVID-19:** *Coronavirus* Disease 2019
- 838 **GBNC:** Google Books Ngram Corpus
- 839 **GDELT:** Global Data on Events, Location and Tone
- 840 **ICD:** International Classification of Diseases
- 841 **ICD-11:** Eleventh revision of the International Classification of Diseases
- 842 **MERS:** Middle Eastern Respiratory Syndrome
- 843 **OED Online:** Oxford English Dictionary Online
- 844 **PCA:** Principal Component Analysis

845           **PPMI:** Positive Pointwise Mutual Information  
846           **SARS:** Severe Acute Respiratory Syndrome  
847           **SVD:** Singular Value Decomposition  
848           **WHA:** World Health Assembly  
849           **WHO:** World Health Organization

### **Multimedia Appendix 1** PRISMA-based flowchart

In this study, we orchestrate rich metadata available to unveil the scientific paradigms via four pertinent experiments, following the Preferred Reporting Items for Systematic Reviews and Meta-Analyses (PRISMA) guidelines (PRISMA 2015; Zeraatkar and Ahmadi 2018; Jobin et al. 2019; Page et al. 2021).

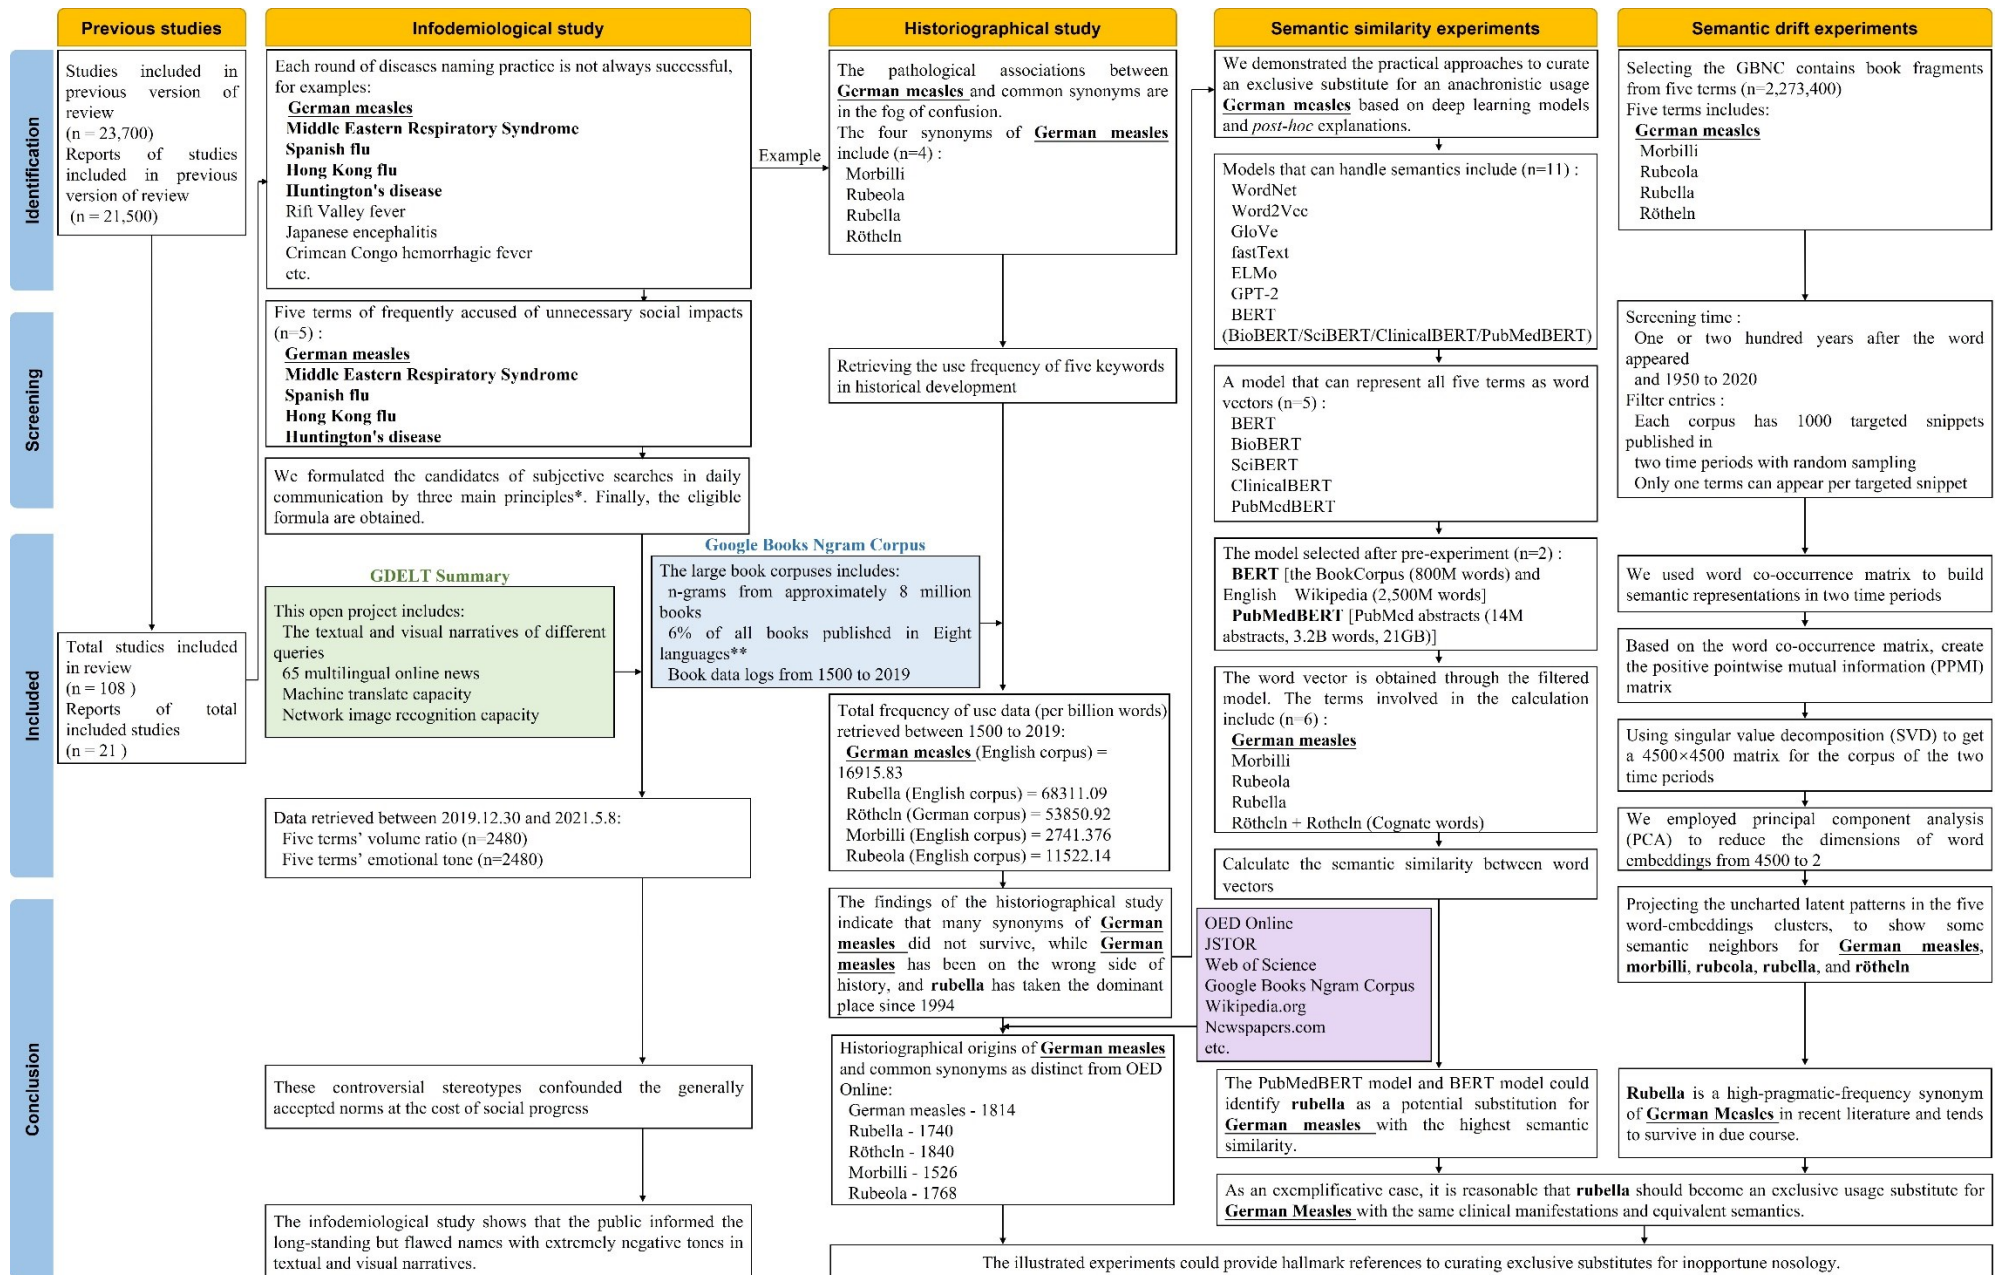

\* We filtered candidates of subjective searches in daily communication by three main principles: (i) Search interest on the top of the ranks; (ii) Be formal and complete in spelling; (iii) As much as possible consistent with global crowd participant.

\*\* Eight languages are English, Hebrew, French, German, Spanish, Russian, Italian, and Chinese, respectively.

Figure A1. PRISMA-based flowchart.



**References:**

- Jobin, A., M. Ienca, and E. Vayena. 2019. The global landscape of AI ethics guidelines. *Nature Machine Intelligence* 1(9): 389–399. doi: 10.1038/s42256-019-0088-2.
- Page, M. J., D. Moher, P. M. Bossuyt, I. Boutron, T. C. Hoffmann, C. D. Mulrow, L. Shamseer, J. M. Tetzlaff, E. A. Akl, S. E. Brennan, R. Chou, J. Glanville, J. M. Grimshaw, A. Hróbjartsson, M. M. Lalu, T. Li, E. W. Loder, E. Mayo-Wilson, S. McDonald, L. A. McGuinness, L. A. Stewart, J. Thomas, A. C. Tricco, V. A. Welch, P. Whiting, and J. E. McKenzie. 2021. PRISMA 2020 explanation and elaboration: updated guidance and exemplars for reporting systematic reviews. *BMJ*: n160. doi: 10.1136/bmj.n160.
- PRISMA. 2015. Transparent reporting of systematic reviews and meta-analyses: PRISMA. <http://www.prisma-statement.org/>
- Zeraatkar, K., and M. Ahmadi. 2018. Trends of infodemiology studies: a scoping review. *Health Information & Libraries Journal* 35(2): 91–120. doi: 10.1111/hir.12216.

## Multimedia Appendix 2 Code scheme

A defined itemized code scheme of crowd behavior in daily communication is paramount for our understanding of the unbiased and comprehensive archive of global online news. Firstly, the initial search candidates included *German measles*, *Middle Eastern Respiratory Syndrome*, *Spanish flu*, *Hong Kong flu*, and *Huntington's disease*. They have been accused of unnecessary social impacts before [1–10]. Then, we formulated the candidates of subjective searches in daily communication by three main principles: (i) Search interest on the top of the ranks; (ii) Be formal and complete in spelling; (iii) As much as possible consistent with global crowd participant [11]. Finally, the eligible search formulas meeting the inclusion criteria are as following:

- [1] German measles: ("German measles" OR "German Measles") AND PublicationDate>=12/30/2019 AND PublicationDate<=5/8/2021
- [2] Middle Eastern Respiratory Syndrome: ("Middle Eastern respiratory syndrome" OR "Middle Eastern Respiratory Syndrome") AND PublicationDate>=12/30/2019 AND PublicationDate<=5/8/2021
- [3] Spanish flu: ("Spanish flu" OR "Spanish Flu" OR "Spanish influenza" OR "Spanish Influenza") AND PublicationDate>=12/30/2019 AND PublicationDate<=5/8/2021
- [4] Hong Kong flu: ("Hong Kong flu" OR "Hong Kong Flu" OR "Hong Kong influenza" OR "Hong Kong Influenza") AND PublicationDate>=12/30/2019 AND PublicationDate<=5/8/2021
- [5] Huntington's disease: ("Huntington's disease" OR "Huntington's chorea" OR "huntington's disease" OR "huntington's chorea" OR "Huntington Disease" OR "Huntington disease" OR "Huntington chorea" OR "huntington disease" OR "huntington chorea") AND PublicationDate>=12/30/2019 AND PublicationDate<=5/8/2021

By leveraging the capacity of GDELT's machine translate and neural network image recognition, the unbiased news portfolio in 65 languages provides a unique lens into global online news coverage from December 30, 2019 to May 8, 2021.

## References

1. Enserink M. Amid Heightened Concerns, New Name for Novel Coronavirus Emerges. *Science* [Internet] 2013 May 10;340(6133):673–673. PMID:23661733
2. Dowell SF, Bresee JS. Pandemic lessons from Iceland. *Proc Natl Acad Sci* [Internet] 2008 Jan 29;105(4):1109–1110. [doi: 10.1073/pnas.0711535105]
3. Hoppe T. "Spanish Flu": When Infectious Disease Names Blur Origins and Stigmatize Those Infected. *Am J Public Health* [Internet] 2018 Nov;108(11):1462–1464. [doi: 10.2105/AJPH.2018.304645]
4. Have we had Hong Kong flu before? *Lancet* [Internet] 1969 May;293(7601):929–930. [doi: 10.1016/S0140-6736(69)92556-2]
5. Peckham R. Viral surveillance and the 1968 Hong Kong flu pandemic. *J Glob Hist* [Internet] 2020 Nov 6;15(3):444–458. [doi: 10.1017/S1740022820000224]
6. Chang, BS C, Salerno, MSc A, Hsu, MD, MPH EB. Perspectives on xenophobia during epidemics and implications for emergency management. *J Emerg Manag* [Internet] 2020 Dec 10;18(7):23–29. [doi: 10.5055/jem.2020.0521]
7. Wexler A. Stigma, history, and Huntington's disease. *Lancet* [Internet] 2010 Jul;376(9734):18–19. [doi: 10.1016/S0140-6736(10)60957-9]
8. Rawlins M. Huntington's disease out of the closet? *Lancet* [Internet] 2010 Oct;376(9750):1372–1373. [doi: 10.1016/S0140-6736(10)60974-9]
9. Spinney L. Uncovering the true prevalence of Huntington's disease. *Lancet Neurol*

- [Internet] 2010 Aug;9(8):760–761. [doi: 10.1016/S1474-4422(10)70160-5]
10. Editorial. Dispelling the stigma of Huntington’s disease. *Lancet Neurol* [Internet] 2010 Aug;9(8):751. [doi: 10.1016/S1474-4422(10)70170-8]
  11. Hu Z, Yang Z, Li Q, Zhang A. The COVID-19 Infodemic: Infodemiology Study Analyzing Stigmatizing Search Terms. *J Med Internet Res* [Internet] 2020 Nov 16;22(11):e22639. PMID:33156807
